# Supplementary material for: One-pot synthesis of chiral alcohols from alkynes by CF3SO3H/ruthenium tandem catalysis
Source: PubMed Central journal article supplement — RSC Adv. 2018 Apr 19;8(27):14829–32. doi: 10.1039/c8ra02224k (PMC9079948; doi:10.1039/c8ra02224k), 2018-04-19
Supplement: RA-008-C8RA02224K-s001.pdf [file RA-008-C8RA02224K-s001.pdf]

*Supporting Information*

## **One-pot synthesis of chiral alcohols from alkynes by CF<sub>3</sub>SO<sub>3</sub>H/Ruthenium tandem catalysis**

Huan Liu, Sensheng Liu, Haifeng Zhou, \* Qixing Liu, Chunqin Wang

*Research Center of Green Pharmaceutical Technology and Process, Hubei Key Laboratory of  
Natural Products Research and Development, College of Biological and Pharmaceutical Sciences,  
China Three Gorges University, Yichang 443002, China.*

|                                                                                              |     |
|----------------------------------------------------------------------------------------------|-----|
| 1. General Information.....                                                                  | S2  |
| 2. General Procedure for the Synthesis of Racemic Aryl Alcohols.....                         | S2  |
| 3. General Procedure for the Hydration -ATH of Alkynes.....                                  | S2  |
| 4. General procedure for the hydration-ATH of Diethynylbenzene <b>2t</b> and <b>2u</b> ..... | S3  |
| 5. Procedure for Gram Scale Reaction.....                                                    | S3  |
| 6. Analytical Data .....                                                                     | S3  |
| 7. <sup>1</sup> H NMR & <sup>13</sup> C NMR Spectra of the Products.....                     | S11 |
| 8. HPLC Spectra of Products.....                                                             | S32 |

## 1. General information

Unless otherwise stated, all reagents, catalysts and solvents were purchased from commercial suppliers and used without further purification. Column Chromatography was performed with silica gel (200-300 mesh). **NMR** spectra were recorded on Bruker ADVANCE III (400 MHz) spectrometers. CDCl<sub>3</sub> was the solvent used for the **NMR** analysis, with tetramethylsilane as the internal standard. Chemical shifts were reported up field to TMS (0.00 ppm) for <sup>1</sup>H **NMR** and relative to CDCl<sub>3</sub> (77.0 ppm) for <sup>13</sup>C **NMR**. Optical rotations were measured on a MCP-500. Melting point were determined using a X-4 made by Peking Taike Apparatus Co., Ltd. HPLC analysis was conducted on a Waters 2489 Series instrument with chiral column OJ-H, AD-H, AS-H and OD-H.

## 2. General procedure for the synthesis of racemic alcohols

The corresponding aryl ketone (0.2 mmol) was dissolved in 1.0 mL MeOH, and NaBH<sub>4</sub> solid (0.4 mmol) was added slowly. The mixture was stirred until the starting material was disappeared. And then 5.0 mL of H<sub>2</sub>O was added slowly, the residue was extracted 3 times with ethyl acetate. The combined organic layer was dried over Na<sub>2</sub>SO<sub>4</sub> and evaporated in vacuo. The product was further purified by silica gel column.

## 3. General procedure for the hydration-ATH of alkynes

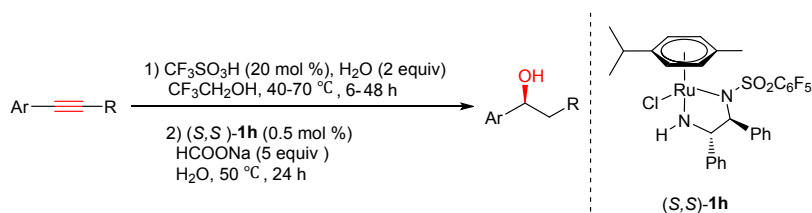

Under nitrogen atmosphere, the corresponding alkyne (5 mmol), CF<sub>3</sub>SO<sub>3</sub>H (1 mmol, 88 μL), H<sub>2</sub>O (10 mmol, 180 uL), and CF<sub>3</sub>CH<sub>2</sub>OH (2 mL) were added to a 30 mL Schlenk tube. The reaction mixture was stirred at 40-70 °C for 6-48 h. After the hydration was completed monitored by gas chromatography, (*S,S*)-**1h** (0.025 mmol, 17.8 mg), HCOONa (25 mmol, 1.7 g) and H<sub>2</sub>O (2 mL) were added, the reaction mixture was stirred at 50 °C for 24 h. The mixture was extracted 3 times with ethyl acetate, and the combined organic layer was dried over Na<sub>2</sub>SO<sub>4</sub> and evaporated in vacuo. The product was further purified by silica gel column.

#### 4. General procedure for the hydration-ATH of diethynylbenzene **2t** and **2u**

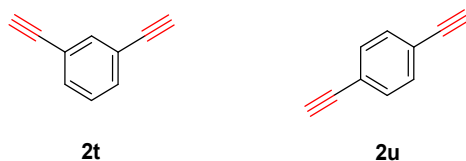

Under nitrogen atmosphere, the diethynylbenzene **2t** or **2u** (5 mmol), CF<sub>3</sub>SO<sub>3</sub>H (2 mmol, 176 μL), H<sub>2</sub>O (20 mmol, 360 μL), and CF<sub>3</sub>CH<sub>2</sub>OH (4 mL) were added to a 30 mL Schlenk tube. The reaction mixture was stirred at 70 °C for 48 h. After the hydration was complete monitored by gas chromatography, (*S,S*)-**1h** (0.05 mmol, 35.6 mg), HCOONa (50 mmol, 3.4 g) and H<sub>2</sub>O (4 mL) were added, the reaction mixture was stirred at 50 °C for 48 h. The mixture was extracted 3 times with ethyl acetate, and the combined organic layer was dried over Na<sub>2</sub>SO<sub>4</sub> and evaporated in vacuo. The product was further purified by silica gel column.

#### 5. Procedure for gram scale reaction

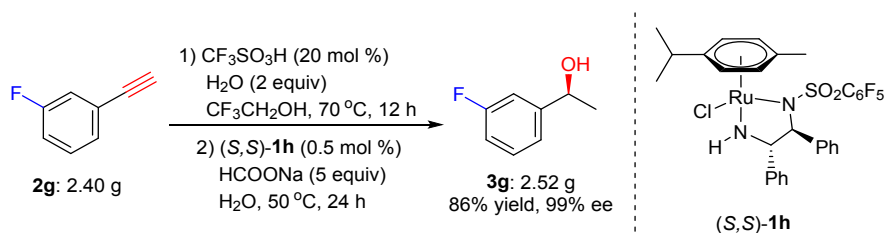

Under nitrogen atmosphere, 3-fluorophenylacetylene **2g** (20 mmol, 2.4 g), CF<sub>3</sub>SO<sub>3</sub>H (4 mmol, 0.35 mL), H<sub>2</sub>O (40 mmol, 0.72 mL), and CF<sub>3</sub>CH<sub>2</sub>OH (5 mL) was added to a 50 mL Schlenk flask. The reaction mixture was stirred at 70 °C for 12 h. After the reaction was complete, (*S,S*)-**1h** (0.1 mmol, 71.2 mg), HCOONa (100 mmol, 6.8 g) and H<sub>2</sub>O (5 mL) were added. The reaction mixture was stirred at 50 °C for 24 h, The mixture was extracted 3 times with ethyl acetate, and the combined organic layer was dried over Na<sub>2</sub>SO<sub>4</sub> and evaporated in vacuo. The product was further purified by silica gel column.

#### 6. Analytical Data of the Products

(*S*)-1-phenylethanol (**3a**, CAS: 1445-91-6, known compound)<sup>[1]</sup>

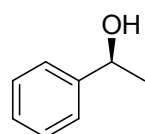

Colourless oil; 95% yield (580 mg), 97% ee. Purified by flash column chromatography (PE: EA = 10:1). ([α]<sub>D</sub><sup>20</sup> -54.2 (c 0.8, CHCl<sub>3</sub>)). **<sup>1</sup>H NMR** (400 MHz, CDCl<sub>3</sub>): δ = 7.43-7.38 (m, 4H), 7.34-7.32 (m, 1H), 4.94 (q, *J* = 6.4 Hz, 1H), 2.03 (s, 1H), 1.54 (d, *J* = 6.4 Hz, 3H); **<sup>13</sup>C NMR** (100 MHz, CDCl<sub>3</sub>): δ = 145.8, 128.5, 127.5,

125.4, 70.5, 25.2. HPLC (Chiralcel OD-H column, n-hexane/2-propanol = 97:3 (v/v), 1.0 mL/min, 254 nm, 30 °C),  $t_R$  = 11.59 min (minor),  $t_S$  = 13.82 min (major).

(*S*)-1-(*p*-tolyl)ethanol (**3b**, CAS: 51154-54-2, know compound)<sup>[1]</sup>

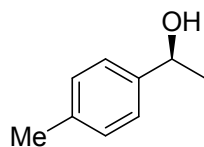

Yellow oil; 83% yield (565 mg), 98% ee. Purified by flash column chromatography (PE: EA = 10:1). ( $[\alpha]_D^{20}$  -58.6 (*c* 1.0, CHCl<sub>3</sub>)). **<sup>1</sup>H NMR** (400 MHz, CDCl<sub>3</sub>):  $\delta$  = 7.31 (d, *J* = 8.0 Hz, 2H), 7.21 (d, *J* = 8.0 Hz, 2H), 4.91 (q, *J* = 6.4 Hz, 1H), 2.40 (s, 3H), 1.97 (br s, 1H), 1.53 (d, *J* = 6.4 Hz, 3H); **<sup>13</sup>C NMR** (100 MHz, CDCl<sub>3</sub>):  $\delta$  = 142.9, 137.2, 129.2, 125.4, 70.3, 25.1, 21.1. HPLC (Chiralcel OJ-H column, n-hexane/2-propanol = 95:5 (v/v), 1.0 mL/min, 220 nm, 30 °C),  $t_S$  = 10.69 min (major),  $t_R$  = 12.46 min (minor).

(*S*)-1-(4-ethylphenyl)ethanol (**3c**, CAS: 101219-72-1, know compound)<sup>[1]</sup>

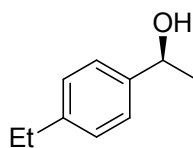

Yellow oil; 84% yield (630 mg), 93% ee. Purified by flash column chromatography (PE: EA = 10:1). ( $[\alpha]_D^{20}$  -48.2 (*c* 1.0, CHCl<sub>3</sub>)). **<sup>1</sup>H NMR** (400 MHz, CDCl<sub>3</sub>):  $\delta$  = 7.35 (d, *J* = 8.0 Hz, 2H), 7.24 (d, *J* = 8.0 Hz, 2H), 4.93 (q, *J* = 6.4 Hz, 1H), 2.69 (q, *J* = 7.6 Hz, 2H), 1.79 (br s, 1H), 1.54 (d, *J* = 6.4 Hz, 3H), 1.28 (t, *J* = 7.6 Hz, 3H); **<sup>13</sup>C NMR** (100 MHz, CDCl<sub>3</sub>):  $\delta$  = 143.7, 143.1, 128.0, 125.5, 70.3, 28.6, 25.1, 15.7. HPLC (Chiralcel OD-H column, n-hexane/2-propanol = 99:1 (v/v), 1.0 mL/min, 254 nm, 30 °C),  $t_R$  = 18.78 min (minor),  $t_S$  = 19.89 min (major).

(*S*)-1-(4-propylphenyl)ethanol (**3d**, CAS: 473700-93-5, know compound)<sup>[1]</sup>

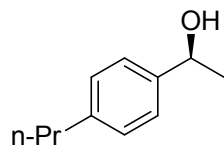

Yellow oil; 74% yield (608 mg), 95% ee. Purified by flash column chromatography (PE: EA = 10:1). ( $[\alpha]_D^{20}$  -47.8 (*c* 1.0, CHCl<sub>3</sub>)). **<sup>1</sup>H NMR** (400 MHz, CDCl<sub>3</sub>):  $\delta$  = 7.33 (d, *J* = 8.0 Hz, 2H), 7.21 (d, *J* = 8.0 Hz, 2H), 4.92 (q, *J* = 6.4 Hz, 1H), 2.63 (t, *J* = 7.2 Hz, 2H), 1.92 (s, 1H), 1.73-1.66 (m, 3H), 1.54 (d, *J* = 6.4 Hz, 3H), 0.99 (t, *J* = 7.2 Hz, 3H); **<sup>13</sup>C NMR** (100 MHz, CDCl<sub>3</sub>):  $\delta$  = 143.1, 142.0, 128.6, 125.4, 70.3, 37.7, 25.0, 24.6, 13.9. HPLC (Chiralcel OD-H column, n-hexane/2-propanol = 97:3 (v/v), 1.0 mL/min, 254 nm, 30 °C),  $t_R$  = 8.17 min (minor),  $t_S$  = 8.90 min (major).

(*S*)-1-(4-methoxyphenyl)ethanol (**3e**, CAS: 1572-97-0, know compound)<sup>[1]</sup>

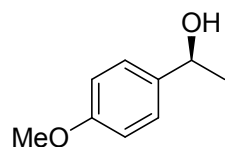

Colourless oil; 77% yield (586 mg), 92% ee. Purified by flash column chromatography (PE: EA = 10:1). ( $[\alpha]_D^{20}$  -50.6 (*c* 1.0, CHCl<sub>3</sub>)). **<sup>1</sup>H NMR** (400 MHz, CDCl<sub>3</sub>):  $\delta$  = 7.33 (dd,  $J_1$  = 2.8 Hz,  $J_2$  = 11.2 Hz, 2H), 6.92 (dd,  $J_1$  = 2.8 Hz,  $J_2$  = 11.2 Hz, 2H), 4.86 (q,  $J$  = 6.4 Hz, 1H), 3.84 (s, 3H), 2.23 (s, 1H), 1.50 (d,  $J$  = 6.4 Hz, 3H); **<sup>13</sup>C NMR** (100 MHz, CDCl<sub>3</sub>):  $\delta$  = 158.9, 138.1, 126.7, 113.8, 69.9, 55.3, 25.1. HPLC (Chiralcel OD-H column, n-hexane/2-propanol = 97:3 (v/v), 1.0 mL/min, 254nm, 30 °C),  $t_R$  = 15.98 min (minor),  $t_S$  = 17.12min (major).

(*S*)-1-(2-fluorophenyl)ethanol (**3f**, CAS: 171032-87-4, know compound)<sup>[2]</sup>

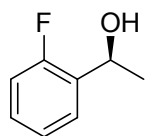

Colourless oil; 82% yield (575 mg), 90% ee. Purified by flash column chromatography (PE: EA = 10:1). ( $[\alpha]_D^{20}$  -41.8 (*c* 0.9, CHCl<sub>3</sub>)). **<sup>1</sup>H NMR** (400 MHz, CDCl<sub>3</sub>):  $\delta$  = 7.52-7.49 (m, 1H), 7.29-7.27 (m, 1H), 7.20-7.16 (m, 1H), 7.07-7.03 (m, 1H) 5.21 (q,  $J$  = 4.0 Hz, 1H), 2.48 (br s, 1H), 1.54 (d,  $J$  = 6.4 Hz, 3H); **<sup>13</sup>C NMR** (100 MHz, CDCl<sub>3</sub>):  $\delta$  = 159.7 (d,  $J_{C-F}$  = 243 Hz), 132.7 (d,  $J_{C-F}$  = 14 Hz), 128.8 (d,  $J_{C-F}$  = 8.0 Hz), 126.7 (d,  $J_{C-F}$  = 4 Hz), 124.3 (d,  $J_{C-F}$  = 3 Hz), 115.3 (d,  $J_{C-F}$  = 22Hz), 64.5 (d,  $J_{C-F}$  = 3 Hz), 24.0. HPLC (Chiralcel OD-H column, n-hexane/2-propanol = 98:2 (v/v), 1.0 mL/min, 254 nm, 30 °C),  $t_R$  = 10.72 min (minor),  $t_S$  = 11.57 min (major).

(*S*)-1-(3-fluorophenyl)ethanol (**3g**, CAS: 126534-32-5, know compound)<sup>[1]</sup>

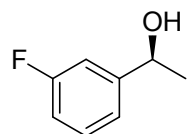

Light yellow oil; 80% yield (561 mg), 99.6% ee. Purified by flash column chromatography (PE: EA = 10:1). ( $[\alpha]_D^{20}$  -48.7 (*c* 1.0, CHCl<sub>3</sub>)). **<sup>1</sup>H NMR** (400 MHz, CDCl<sub>3</sub>):  $\delta$  = 7.35-7.30 (m, 1H), 7.17-7.11 (m, 2H), 7.02-6.96 (m, 1H), 4.92 (q,  $J$  = 6.4 Hz, 1H), 2.14 (br s, 1H), 1.52 (d,  $J$  = 6.4 Hz, 3H); **<sup>13</sup>C NMR** (100 MHz, CDCl<sub>3</sub>):  $\delta$  = 163.0 (d,  $J_{C-F}$  = 244.3Hz), 148.5 (d,  $J_{C-F}$  = 6.5 Hz), 130.0 (d,  $J_{C-F}$  = 8.0 Hz), 120.9 (d,  $J_{C-F}$  = 2.8 Hz), 114.2 (d,  $J_{C-F}$  = 21.0 Hz), 112.3 (d,  $J_{C-F}$  = 21.7Hz), 69.8 (d,  $J_{C-F}$  = 1.5 Hz), 25.2. HPLC (Chiralcel AD-H column, n-hexane/2-propanol = 95:5 (v/v), 1.0 mL/min, 254 nm, 30 °C),  $t_S$  = 6.71 min (major),  $t_R$  = 8.58min (minor).

(*S*)-1-(4-fluorophenyl)ethanol (**3h**, CAS: 101219-73-2, know compound)<sup>[1]</sup>

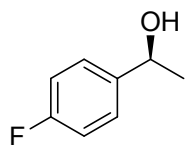

Light yellow oil; 90% yield (631 mg), 91% ee. Purified by flash column chromatography (PE: EA = 10:1). ( $[\alpha]_D^{20}$  -64.0 (*c* 1.0, CHCl<sub>3</sub>)). **<sup>1</sup>H NMR** (400 MHz, CDCl<sub>3</sub>):  $\delta$  = 7.38-7.34 (m, 2H), 7.08-7.04 (m, 2H), 4.90 (q, *J* = 6.8 Hz, 1H), 2.27 (br s, 1H), 1.50 (d, *J* = 6.8 Hz, 3H); **<sup>13</sup>C NMR** (100 MHz, CDCl<sub>3</sub>):  $\delta$  = 162.1 (d, *J*<sub>C-F</sub> = 243 Hz), 141.6 (d, *J*<sub>C-F</sub> = 3 Hz), 127.1 (d, *J*<sub>C-F</sub> = 8.0 Hz), 115.3 (d, *J*<sub>C-F</sub> = 21.0 Hz), 69.7, 25.3. HPLC (Chiralcel AS-H column, n-hexane/2-propanol = 98:2 (v/v), 1.0 mL/min, 254nm, 30 °C), *t*<sub>R</sub> = 12.61 min (minor), *t*<sub>S</sub> = 14.07 min (major).

(*S*)-1-(2-chlorophenyl)ethanol (**3i**, CAS:131864-71-6, know compound)<sup>[3]</sup>

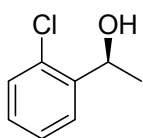

Colourless oil; 88% yield (689 mg), 87% ee. Purified by flash column chromatography (PE: EA = 10:1). ( $[\alpha]_D^{20}$  -64.3 (*c* 1.0, CHCl<sub>3</sub>)). **<sup>1</sup>H NMR** (400 MHz, CDCl<sub>3</sub>):  $\delta$  = 7.64 (dd, *J*<sub>1</sub> = 1.6 Hz, *J*<sub>2</sub> = 7.6 Hz, 1H), 7.38-7.32 (m, 2H), 7.27-7.23 (m, 1H), 5.35 (q, *J* = 6.4 Hz, 1H), 2.05 (s, 1H), 1.54 (d, *J* = 6.4 Hz, 3H); **<sup>13</sup>C NMR** (100 MHz, CDCl<sub>3</sub>):  $\delta$  = 143.1, 131.7, 129.4, 128.5, 127.3, 126.4, 67.0, 23.5. HPLC (Chiralcel OD-H column, n-hexane/2-propanol = 99:1 (v/v), 1.0 mL/min, 254 nm, 30 °C), *t*<sub>R</sub> = 20.65 min (minor), *t*<sub>S</sub> = 22.28 min (major).

(*S*)-1-(4-chlorophenyl)ethanol (**3j**, CAS: 99528-42-4, know compound)<sup>[1]</sup>

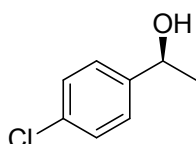

Colourless oil; 85% yield (666 mg), 92% ee. Purified by flash column chromatography (PE: EA = 10:1). ( $[\alpha]_D^{20}$  -60.0 (*c* 1.0, CHCl<sub>3</sub>)). **<sup>1</sup>H NMR** (400 MHz, CDCl<sub>3</sub>):  $\delta$  = 7.37-7.32 (m, 4H), 4.91 (q, *J* = 6.4 Hz, 1H), 2.06 (s, 1H), 1.50 (d, *J* = 6.4 Hz, 3H); **<sup>13</sup>C NMR** (100 MHz, CDCl<sub>3</sub>):  $\delta$  = 144.3, 133.1, 128.6, 126.8, 69.8, 25.3. HPLC (Chiralcel OD-H column, n-hexane/2-propanol = 97:3 (v/v), 1.0 mL/min, 220 nm, 30 °C), *t*<sub>S</sub> = 10.73 min (major), *t*<sub>R</sub> = 11.91 min (minor).

(*S*)-1-(2,5-dichlorophenyl)ethanol (**3k**, CAS: 691881-93-3, know compound)<sup>[3]</sup>

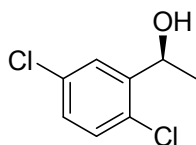

Colourless oil; 79% yield (755 mg), 86% ee. Purified by flash column chromatography (PE: EA = 10:1). ( $[\alpha]_D^{20}$  -72.0 (*c* 0.8, CHCl<sub>3</sub>)). **<sup>1</sup>H NMR** (400 MHz, CDCl<sub>3</sub>):  $\delta$  = 7.51 (d, *J* = 8.4 Hz, 1H), 7.35 (s, 1H), 7.28 (dd, *J*<sub>1</sub> = 2.0 Hz, *J*<sub>2</sub> = 8.4 Hz, 1H), 5.22 (q, *J* = 6.4 Hz, 1H), 2.78 (s, 1H), 1.46 (d, *J* = 6.4 Hz, 3H); **<sup>13</sup>C NMR** (100 MHz, CDCl<sub>3</sub>):  $\delta$  = 141.7, 133.4, 132.1, 129.1, 127.5, 127.4, 66.5, 23.6. HPLC (Chiralcel OD-H

column, n-hexane/2-propanol = 99:1 (v/v), 1.0 mL/min, 220 nm, 30 °C),  $t_S$  = 19.90 min (major),  $t_R$  = 21.43 min (minor).

(*S*)-1-(3-bromophenyl)ethanol (**3l**, CAS: 134615-22-8, know compound)<sup>[1]</sup>

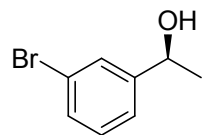

Colourless oil; 78% yield (784 mg), 92% ee. Purified by flash column chromatography (PE: EA = 10:1). ( $[\alpha]_D^{20}$  -46.7 (*c* 1.0, CHCl<sub>3</sub>)). **<sup>1</sup>H NMR** (400 MHz, CDCl<sub>3</sub>):  $\delta$  = 7.54 (s, 1H), 7.44-7.41 (m, 1H), 7.30-7.28 (d, *J* = 7.6, 1H), 7.23 (t, *J* = 7.6 Hz, 1H), 4.85 (q, *J* = 6.4 Hz, 1H), 2.56 (s, 1H), 1.48 (d, *J* = 6.4 Hz, 3H); **<sup>13</sup>C NMR** (100 MHz, CDCl<sub>3</sub>):  $\delta$  = 148.2, 130.5, 130.1, 128.6, 124.1, 122.6, 69.7, 25.2. HPLC (Chiralcel OD-H column, n-hexane/2-propanol = 95:5 (v/v), 1.0 mL/min, 220 nm, 30 °C),  $t_S$  = 8.74 min (major),  $t_R$  = 9.67 min (minor).

(*S*)-1-(4-bromophenyl)ethanol (**3m**, CAS: 100760-04-1, know compound)<sup>[1]</sup>

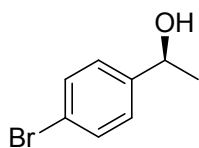

Colourless oil; 68% yield (68 mg), 91% ee. Purified by flash column chromatography (PE: EA = 10:1). ( $[\alpha]_D^{20}$  -30.2 (*c* 0.9, CHCl<sub>3</sub>)). **<sup>1</sup>H NMR** (400 MHz, CDCl<sub>3</sub>):  $\delta$  = 7.51(d, *J* = 8.4 Hz, 2H), 7.28 (d, *J* = 8.4 Hz, 2H), 4.90 (q, *J* = 6.4 Hz, 1H), 2.04 (br s, 1H), 1.51 (d, *J* = 6.4 Hz, 3H); **<sup>13</sup>C NMR** (100 MHz, CDCl<sub>3</sub>):  $\delta$  = 144.8, 131.6, 127.2, 121.2, 69.8, 25.3. HPLC (Chiralcel OD-H column, n-hexane/2-propanol = 95:5 (v/v), 1.0 mL/min, 254 nm, 30 °C),  $t_S$  = 8.41 min (major),  $t_R$  = 9.29 min (minor).

(*S*)-1-(4-nitrophenyl)ethanol (**3n**, CAS: 6531-13-1, know compound)<sup>[1]</sup>

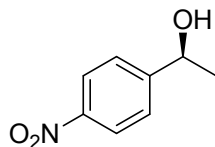

Colourless oil; 66% yield (552 mg), 86% ee. Purified by flash column chromatography (PE: EA = 10:1). ( $[\alpha]_D^{20}$  -24.1 (*c* 0.8, CHCl<sub>3</sub>)). **<sup>1</sup>H NMR** (400 MHz, CDCl<sub>3</sub>):  $\delta$  = 8.21 (dd, *J*<sub>1</sub> = 2.0 Hz, *J*<sub>2</sub> = 6.8 Hz, 2H), 7.57 (d, *J* = 8.4 Hz, 2H), 5.05 (q, *J* = 6.4 Hz, 1H), 2.37 (s, 1H), 1.54 (d, *J* = 6.8 Hz, 3H); **<sup>13</sup>C NMR** (100 MHz, CDCl<sub>3</sub>):  $\delta$  = 153.2, 147.2, 126.2, 123.8, 69.5, 25.5. HPLC (Chiralcel OJ-H column, n-hexane/2-propanol = 95:5 (v/v), 1.0 mL/min, 254 nm, 30 °C),  $t_S$  = 30.88 min (major),  $t_R$  = 34.17 min (minor).

(*S*)-1-(naphthalen-2-yl)ethanol (**3o**, CAS: 27544-18-9, know compound)<sup>[1]</sup>

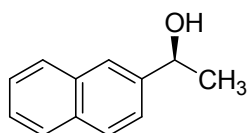

White solid; 88% yield (76 mg), 88% ee. Purified by flash column chromatography (PE: EA = 10:1). ( $[\alpha]_D^{20}$  -40.6 (*c*, 0.70, acetone)).  $^1\text{H NMR}$  (400 MHz,  $\text{CDCl}_3$ ):  $\delta$  = 7.89-7.85 (m, 4H), 7.55-7.50 (m, 3H), 5.11 (q,  $J$  = 2.8 Hz 1H), 2.09 (s, 1H), 1.63 (d,  $J$  = 6.4 Hz, 3H);  $^{13}\text{C NMR}$  (100 MHz,  $\text{CDCl}_3$ ):  $\delta$  = 143.2, 133.4, 133.0, 128.4, 128.0, 127.7, 126.2, 125.8, 123.9, 123.9, 70.6, 25.1. HPLC (Chiralcel OJ-H column, n-hexane/2-propanol = 95:5 (v/v), 1.0 mL/min, 230 nm, 30 °C),  $t_S$  = 23.63 min (major),  $t_R$  = 31.74 min (minor).

(*S*)-1-phenylpropan-1-ol (**3p**, CAS: 613-87-6, know compound) <sup>[4]</sup>

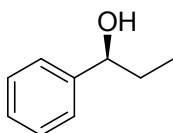

Colourless oil; 67% yield (456 mg), 76% ee. Purified by flash column chromatography (PE: EA = 10:1). ( $[\alpha]_D^{20}$  -38.5 (*c* 1.0,  $\text{CHCl}_3$ )).  $^1\text{H NMR}$  (400 MHz,  $\text{CDCl}_3$ ):  $\delta$  = 7.40-7.38 (m, 4H), 7.34-7.31 (m, 1H), 4.65 (t,  $J$  = 6.8 Hz, 1H), 1.91-1.78 (m, 3H), 0.97 (t,  $J$  = 7.2 Hz 3H);  $^{13}\text{C NMR}$  (100 MHz,  $\text{CDCl}_3$ ):  $\delta$  = 144.6, 128.5, 127.6, 126.0, 76.1, 31.9, 10.2. HPLC (Chiralcel OD-H column, n-hexane/2-propanol = 95:5 (v/v), 1.0 mL/min, 254 nm, 30 °C),  $t_S$  = 8.66 min (major),  $t_R$  = 9.30 min (minor).

(*S*)-1-phenylbutan-1-ol (**3q**, CAS: 22135-49-5, know compound) <sup>[4]</sup>

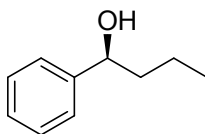

Colourless oil; 74% yield (556 mg), 89% ee. Purified by flash column chromatography (PE: EA = 10:1). ( $[\alpha]_D^{20}$  -45.7 (*c* 0.8,  $\text{CHCl}_3$ )).  $^1\text{H NMR}$  (400 MHz,  $\text{CDCl}_3$ ):  $\delta$  = 7.40-7.39 (m, 4H), 7.34-7.30 (m, 1H), 4.73 (t,  $J$  = 5.6 Hz, 1H), 1.90-1.81(m, 2H), 1.80-1.74 (m, 1H), 1.50-1.47 (m, 1H), 1.38-1.34(m, 1H), 1.00 (t,  $J$  = 7.2 Hz, 3H);  $^{13}\text{C NMR}$  (100 MHz,  $\text{CDCl}_3$ ):  $\delta$  = 144.9, 128.5, 127.5, 125.9, 74.5, 41.3, 19.1, 14.0. HPLC (Chiralcel OD-H column, n-hexane/2-propanol = 98:2 (v/v), 1.0 mL/min, 254 nm, 30 °C),  $t_R$  = 12.65 min (minor),  $t_S$  = 13.37 min (major).

(*S*)-1-phenylhexan-1-ol (**3r**, CAS: 138381-77-8, know compound) <sup>[5]</sup>

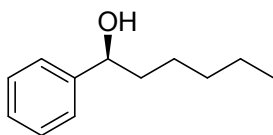

Colourless oil; 67% yield (597 mg), 81% ee. Purified by flash column chromatography (PE: EA = 10:1). ( $[\alpha]_D^{20}$  -41.9 (*c* 1.0,  $\text{CHCl}_3$ )).  $^1\text{H NMR}$  (400 MHz,  $\text{CDCl}_3$ ):  $\delta$  = 7.42-7.37 (m, 4H), 7.34-7.31 (m, 1H), 4.68 (t,  $J$  = 6.4 Hz, 1H), 2.14 (s, 1H), 1.87-1.71 (m, 2H), 1.48-1.43(m, 1H), 1.36-1.34 (m, 5H),



0.93 (t,  $J = 6.4$  Hz, 3H);  $^{13}\text{C}$  NMR (100 MHz,  $\text{CDCl}_3$ ):  $\delta = 145.0, 128.4, 127.5, 126.0, 74.7, 39.10, 31.8, 25.6, 22.6, 14.1$ . HPLC (Chiralcel OD-H column, n-hexane/2-propanol = 99:1 (v/v), 1.0 mL/min, 254 nm, 30 °C),  $t_R = 20.75$  min (minor),  $t_S = 23.75$  min (major).

(*S*)-1,2-diphenylethanol (**3s**, CAS: 5773-56-8, known compound)<sup>[6]</sup>

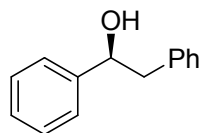

White solid, m. p. = 60-61 °C; 64% yield (634 mg), 82% ee. Purified by flash column chromatography (PE: EA = 5:1). ( $[\alpha]_D^{20} -47.3$  ( $c$  1.0,  $\text{CHCl}_3$ )).  $^1\text{H}$  NMR (400 MHz,  $\text{CDCl}_3$ ):  $\delta = 7.41-7.24$  (m, 10H), 4.97-4.93 (m, 1H), 3.12-3.00 (m, 2H), 2.00 (d,  $J = 2.8$  Hz, 1H);  $^{13}\text{C}$  NMR (100 MHz,  $\text{CDCl}_3$ ):  $\delta = 143.8, 138.1, 129.5, 128.5, 128.5, 127.7, 126.7, 125.9, 75.4, 46.1$ . HPLC (Chiralcel OD-H column, n-hexane/2-propanol = 95:5 (v/v), 1.0 mL/min, 220 nm, 30 °C),  $t_R = 11.89$  min (minor),  $t_S = 13.58$  min (major).

(1*S*,1'*S*)-1,1'-(1,3-phenylene)diethanol (**3t**, CAS: 143329-81-1, known compound)<sup>[7], [8]</sup>

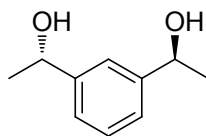

Colourless oil; 72% yield (598 mg, de = 76%), 83% ee, Purified by flash column chromatography (PE: EA = 5:1). ( $[\alpha]_D^{20} -52.6$  ( $c$ , 1.0, acetone)).  $^1\text{H}$  NMR (400 MHz,  $\text{CDCl}_3$ ):  $\delta = 7.38$  (d,  $J = 6.0$  Hz, 1H), 7.33 (t,  $J = 7.4$  Hz, 1H), 7.24 (d,  $J = 7.2$  Hz, 2H), 4.86 (q,  $J = 6.8$  Hz, 2H), 2.78 (s, 2H), 1.48 (d,  $J = 6.4$  Hz, 6H);  $^{13}\text{C}$  NMR (100 MHz,  $\text{CDCl}_3$ ):  $\delta = 146.1, 146.1, 128.6, 128.6, 124.6, 124.5, 122.5, 122.4, 70.3, 70.3, 25.2, 25.1$ . HPLC (Chiralcel OJ-H column, n-hexane/2-propanol = 95:5 (v/v), 1.0 mL/min, 254 nm, 30 °C),  $t_{S,S} = 17.89$  min (minor),  $t_{R,R} = 21.80$  min (major),  $t_{S,R} = 29.62$  min.

(1*S*,1'*S*)-1,1'-(1,4-phenylene)diethanol (**3u**, CAS: 143394-10-9, known compound)<sup>[7], [8]</sup>

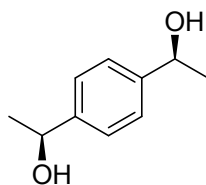

White solid, m.p = 128-130 °C, 75% yield (623 mg, de = 80%), 99% ee, Purified by flash column chromatography (PE: EA = 5:1). ( $[\alpha]_D^{20} -89.8$  ( $c$  1.0, acetone)).  $^1\text{H}$  NMR (400 MHz,  $\text{CDCl}_3$ ):  $\delta = 7.39$  (s, 4H), 4.93 (q,  $J = 6.4$  Hz, 2H), 2.03 (s, 2H), 1.53 (d,  $J = 6.4$  Hz, 6H);  $^{13}\text{C}$  NMR (100 MHz,  $\text{CDCl}_3$ ):  $\delta = 145.1, 125.6, 70.2, 70.2, 25.2$ . HPLC (Chiralcel OD-H column, n-hexane/2-propanol = 90:10 (v/v), 1.0 mL/min, 210 nm, 30 °C),  $t_{R,R} = 12.25$  min (minor),  $t_{S,S} = 13.72$  min (major),  $t_{meso} = 18.64$  min (minor).

## Reference:

- [1] Li, F.; Wang, N.; Lu, L.; Zhu, G. J. *J. Org. Chem.* **2015**, *80*, 3538–3546.
- [2] Wei, S. M.; Du, H. F. *J. Am. Chem. Soc.* **2014**, *136*, 12261–12264.
- [3] Johnson, T. C.; Totty, W. G.; Wills, M. *Org. Lett.* **2012**, *14*, 5230–5233.
- [4] Chen, X.; Lu, Z. *Org. Lett.* **2016**, *18*, 4658–4661.
- [5] Zhang, Z.; Jain, P.; Antilla, J. C. *Angew. Chem., Int. Ed.* **2011**, *50*, 10961–10964.
- [6] Li, J.; Wang, C.; Xue, D.; Wei, Y.; Xiao, J. *Green Chem.* **2013**, *15*, 2685–2689.
- [7] Shimada, Y.; Miyake, Y.; Matsuzawa, H.; Nishibayashi Y., *Chem. Asian J.* **2007**, *2*, 393 – 396.
- [8] Uchiyama, M.; Katoh, N.; Mimura, R., Yokota, N., Shimogaichi, Y., Shimazaki, M., Ohta, A. *Tetrahedron: Asymmetry*, **1997**, *8*, 3467–3474.

## 7. <sup>1</sup>H NMR & <sup>13</sup>C NMR Spectra of the Products

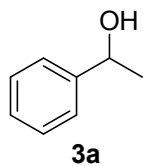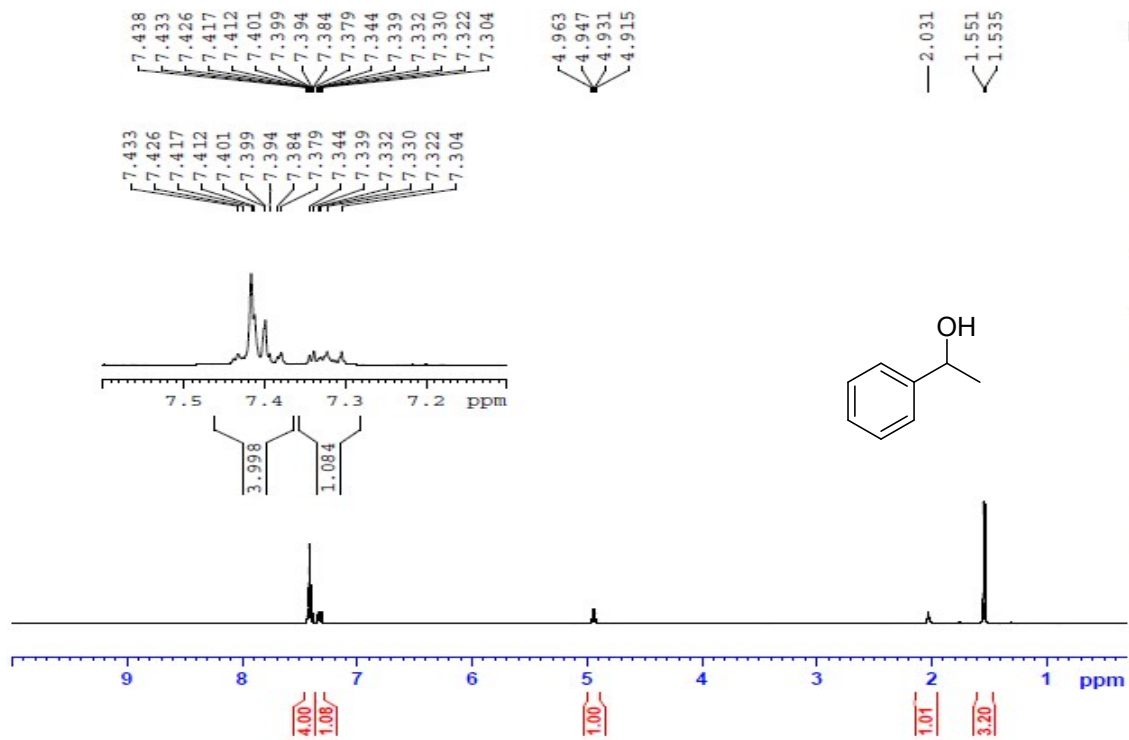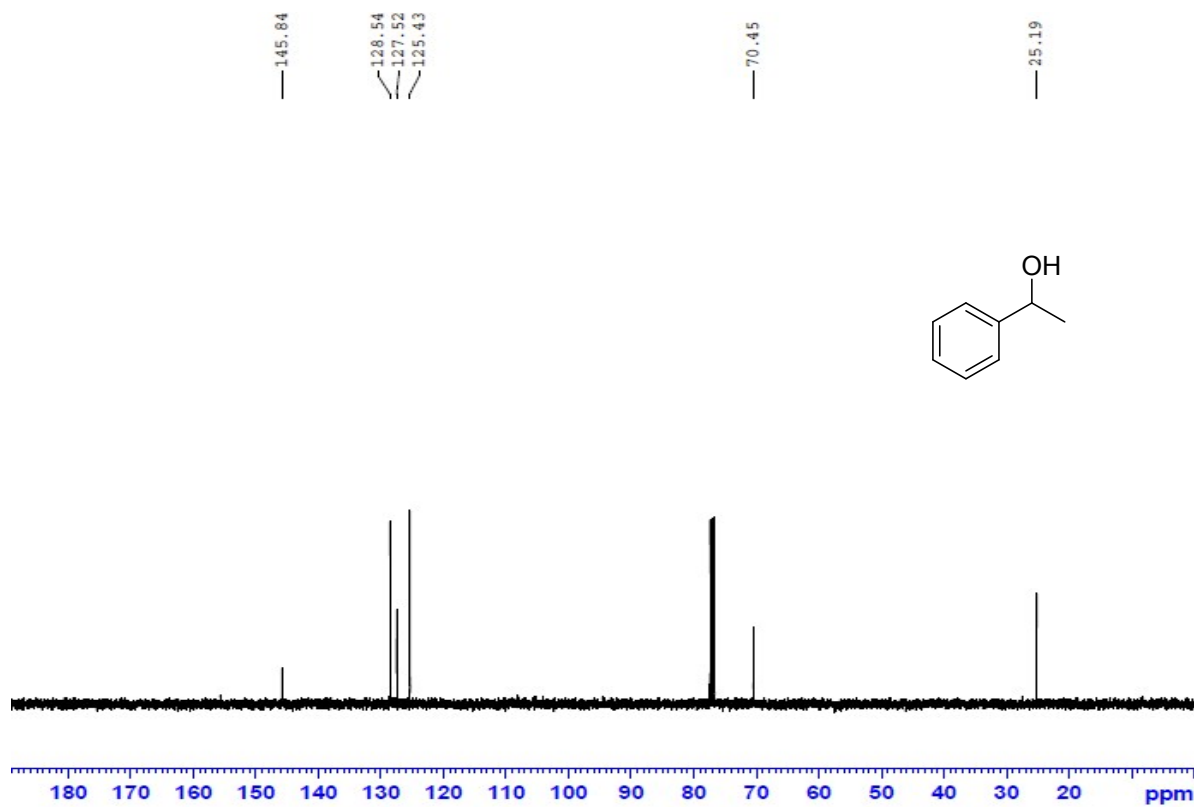

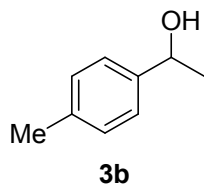

7.323  
7.303  
7.220  
7.201

4.933  
4.916  
4.900  
4.884

2.396  
1.972  
1.538  
1.522

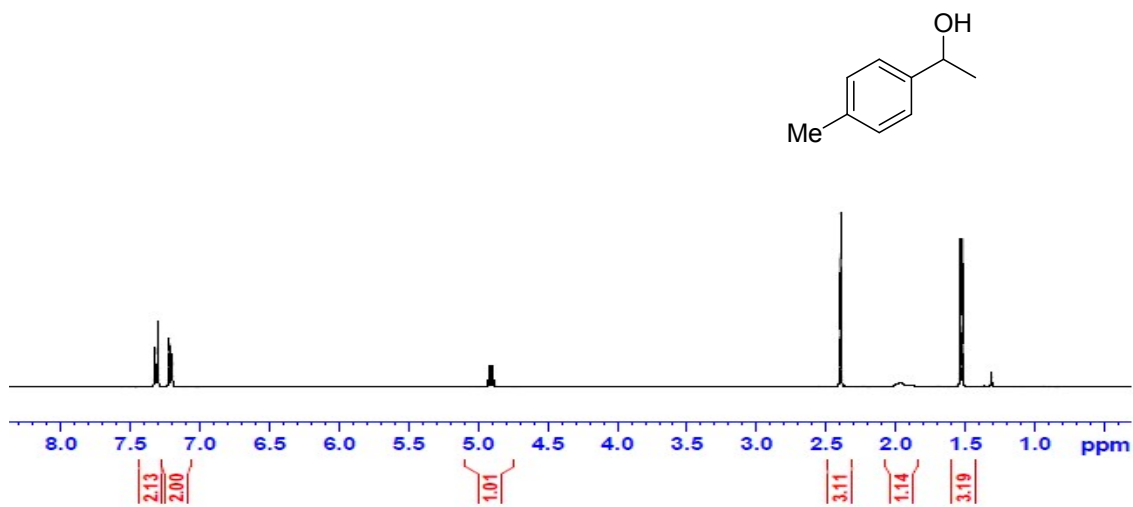

142.910  
137.174  
129.192  
125.390

70.274

25.104  
21.122

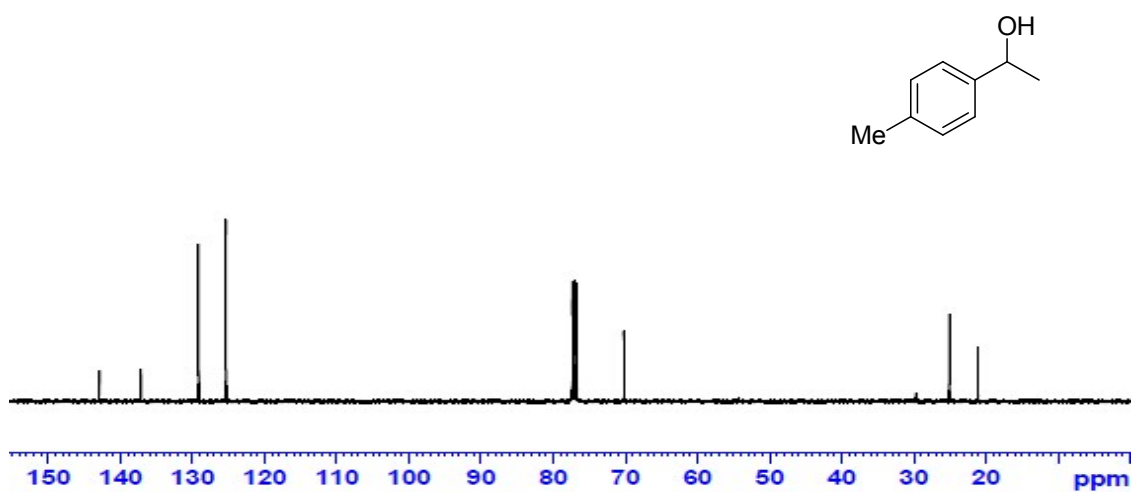

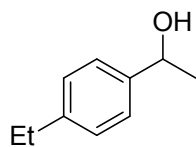

**3c**

7.356  
7.335  
7.305  
7.246  
7.226

4.952  
4.936  
4.920  
4.904

2.719  
2.700  
2.681  
2.662

1.794  
1.619  
1.548  
1.532  
1.298  
1.279  
1.260

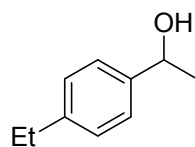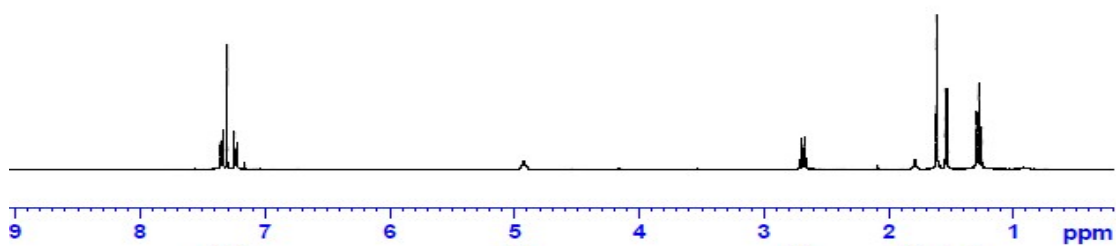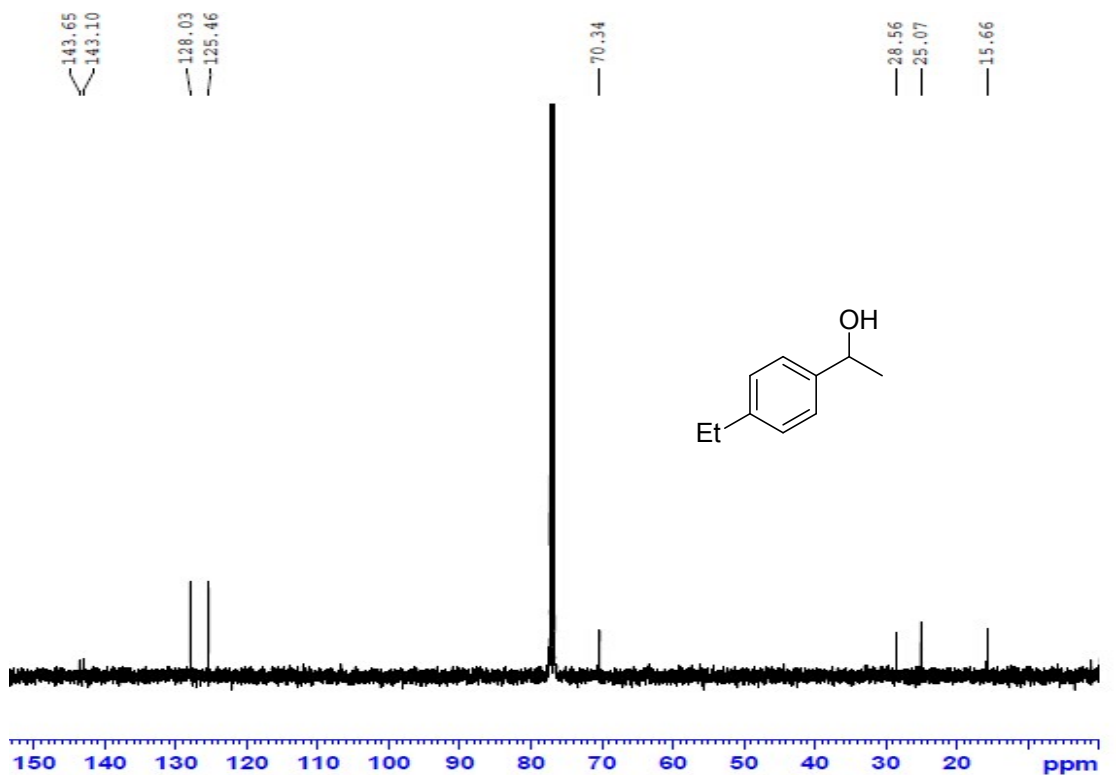

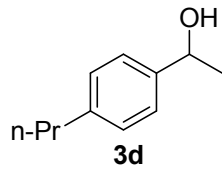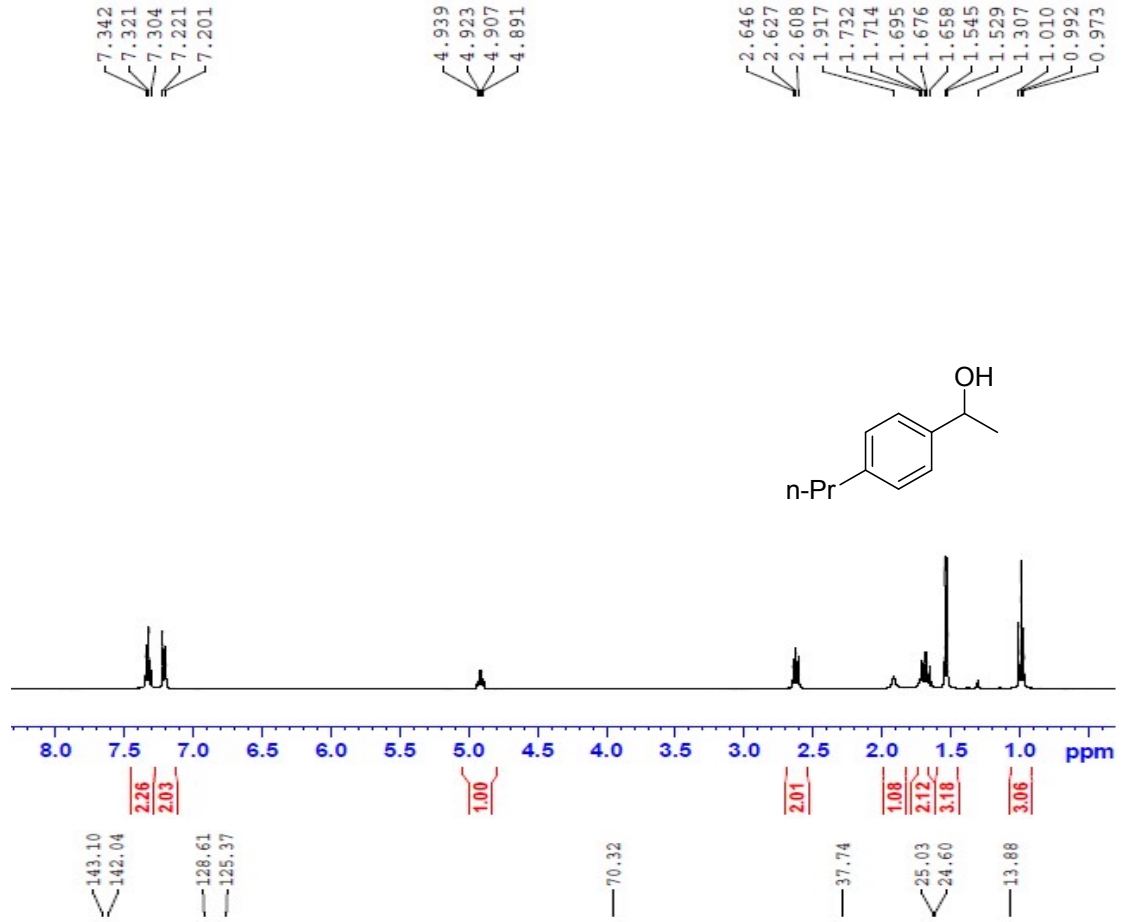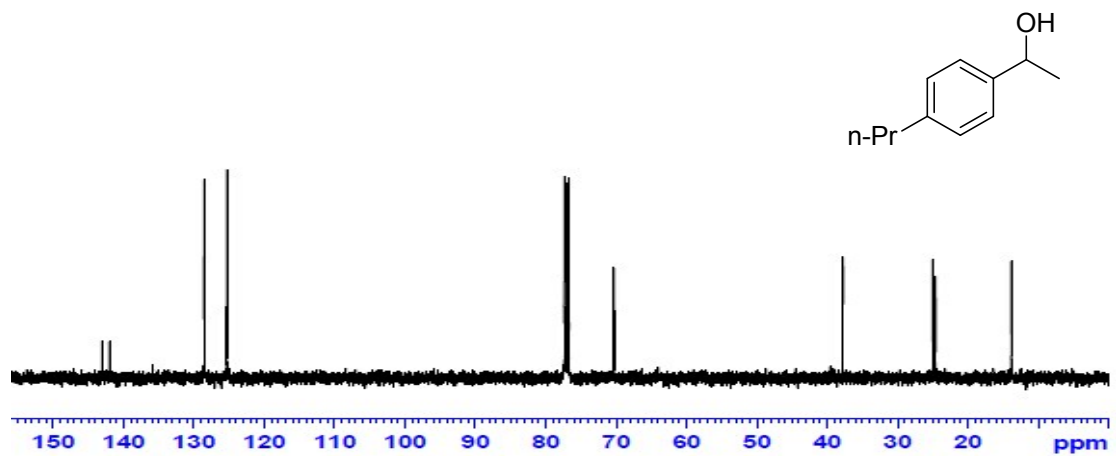

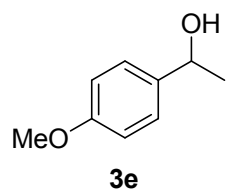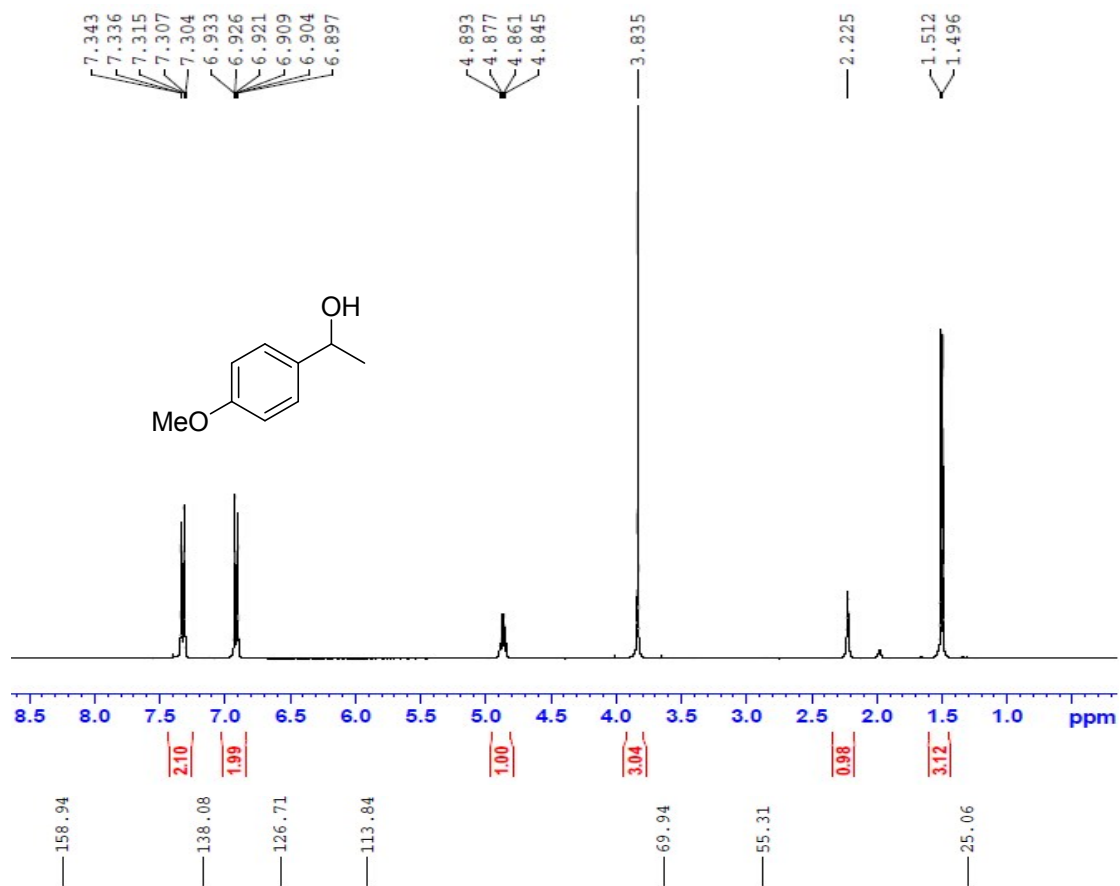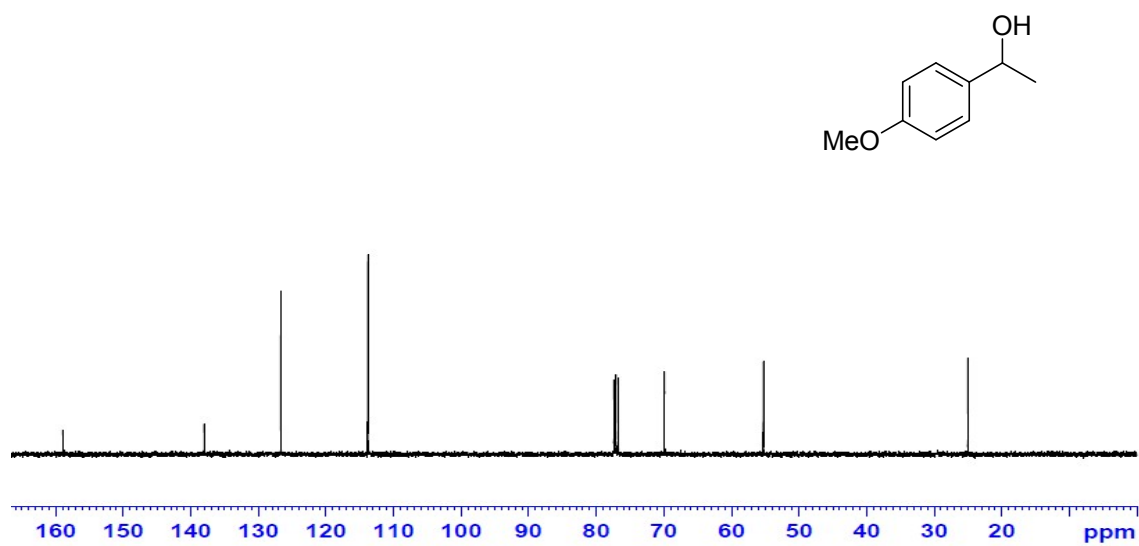

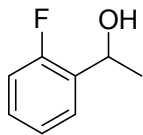

3f

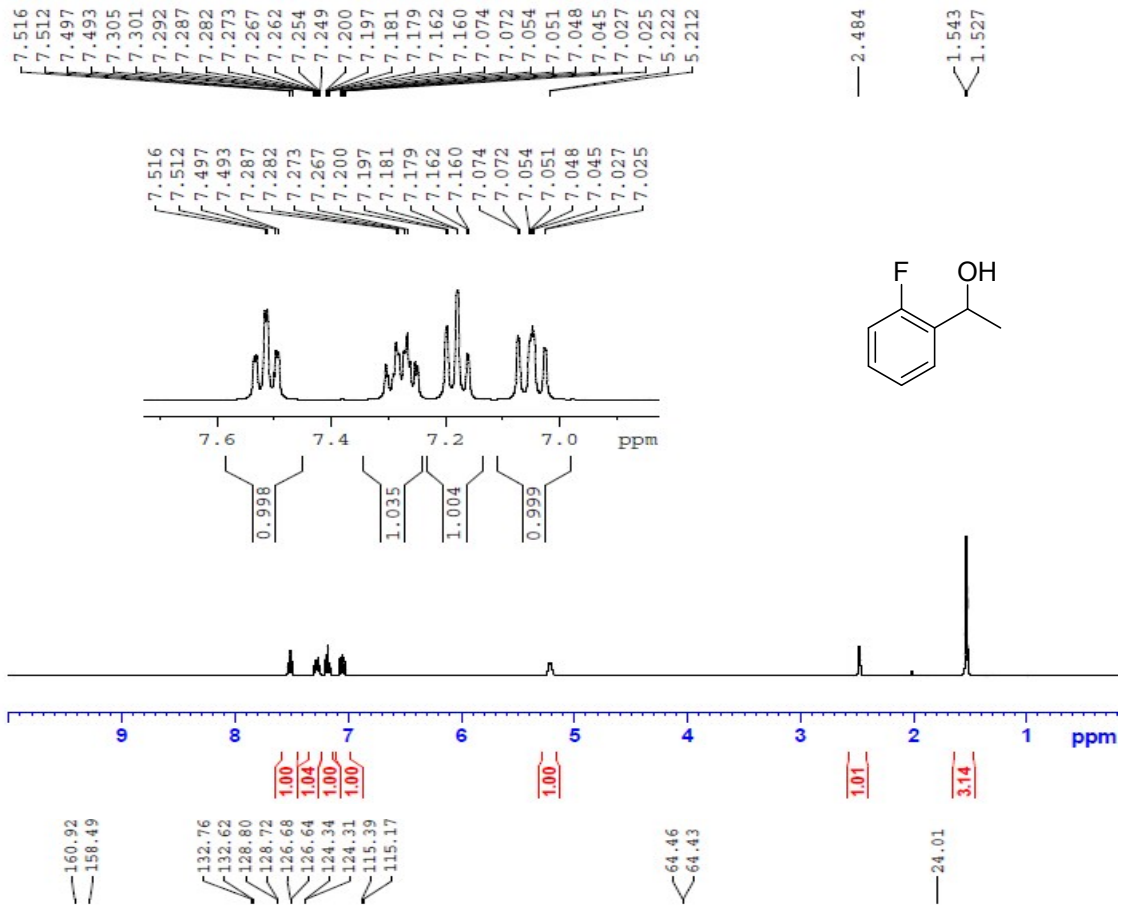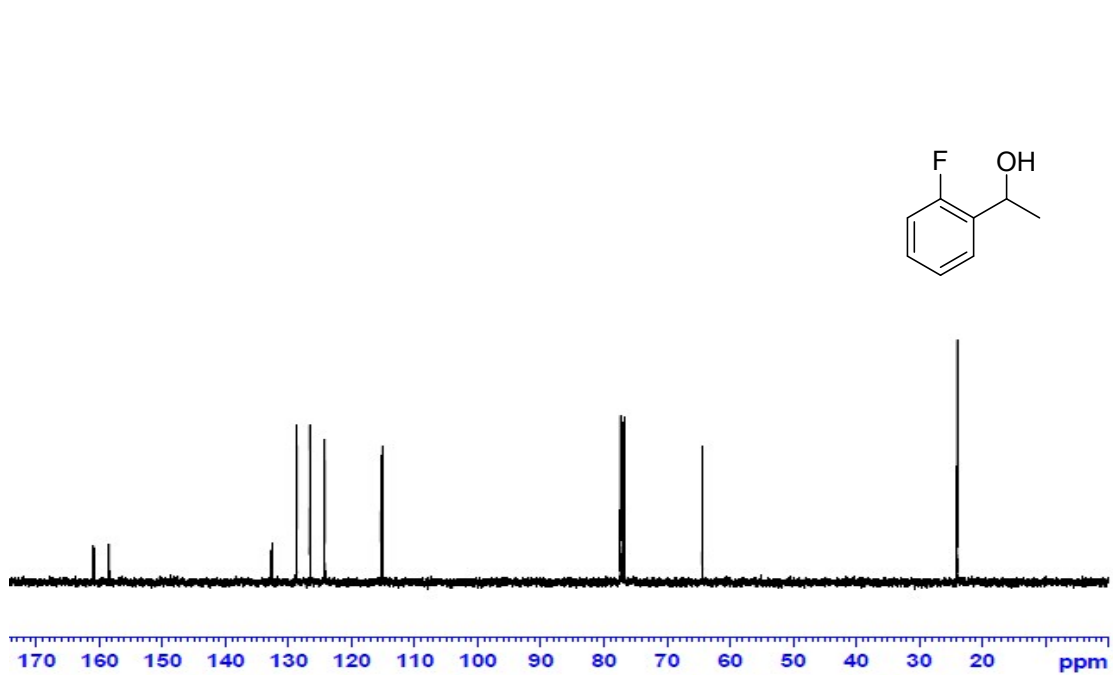



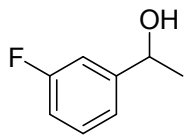

**3g**

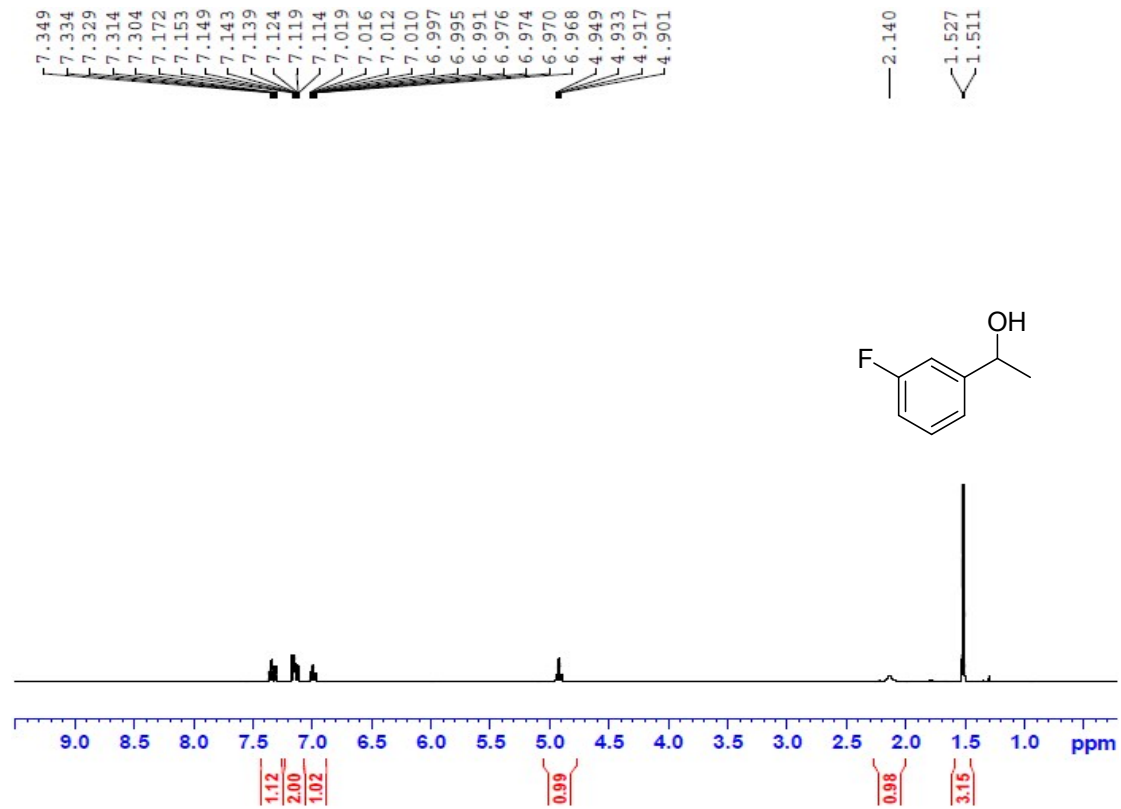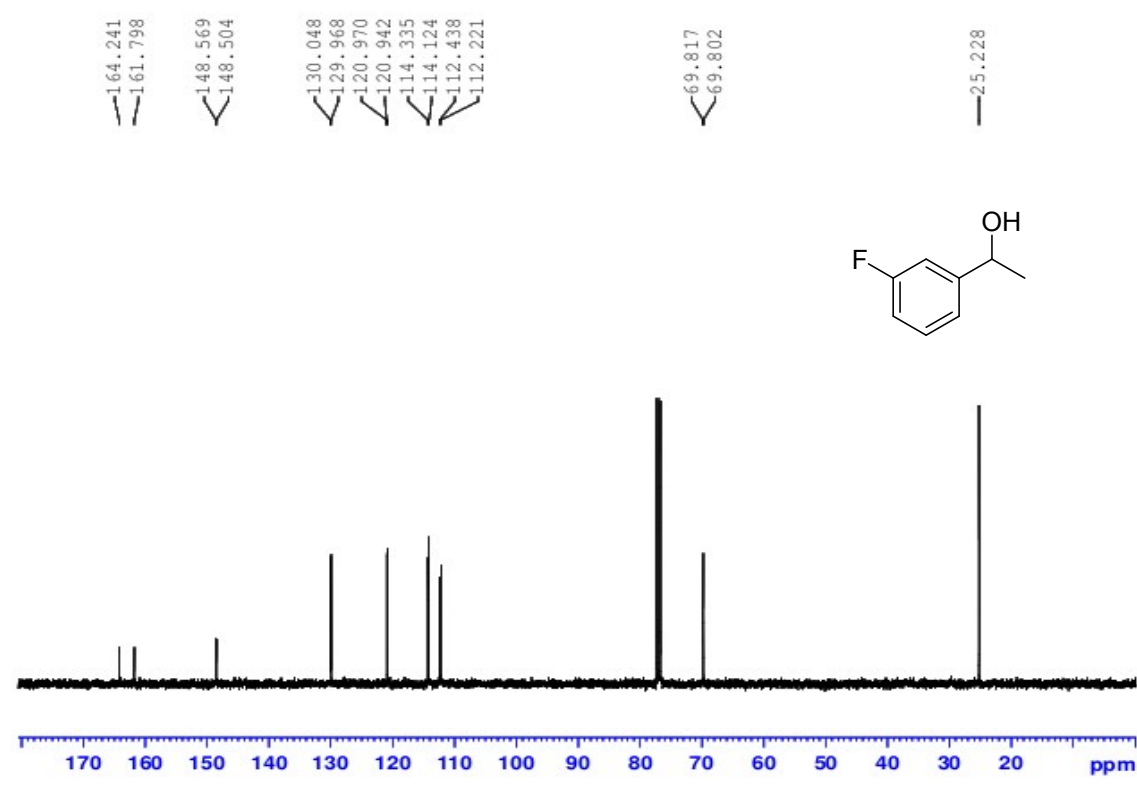

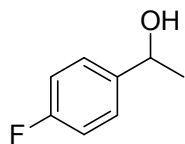

**3h**

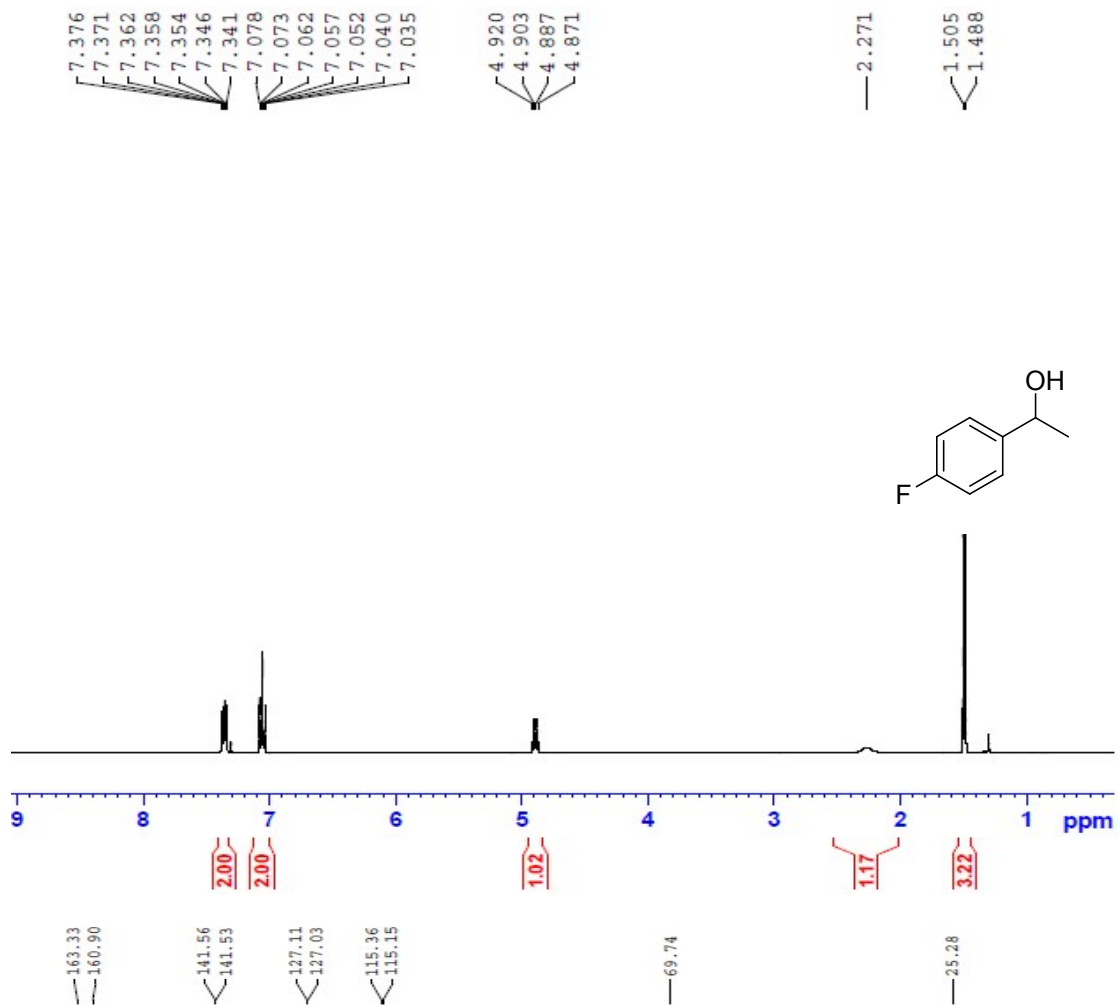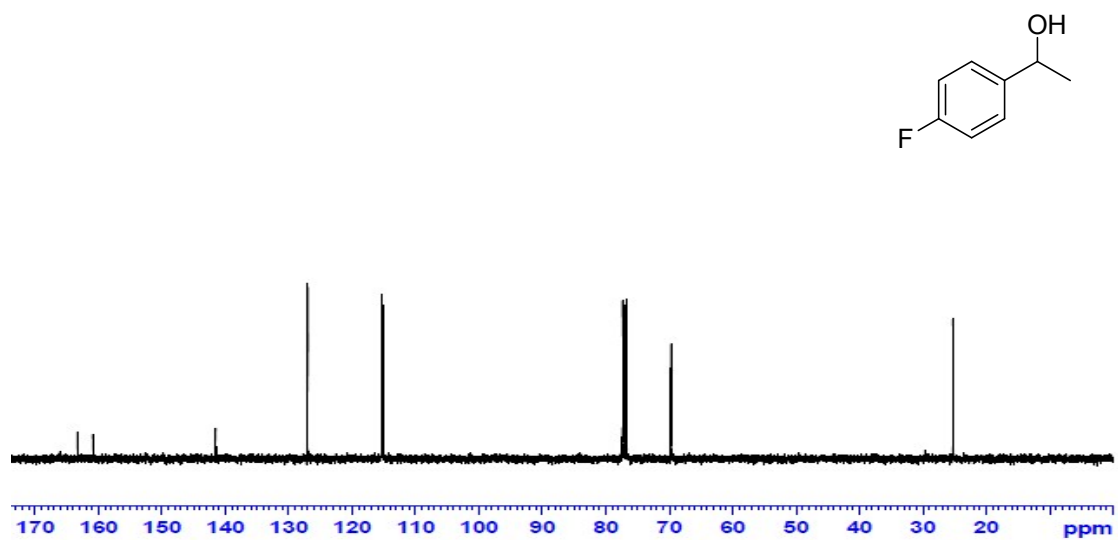

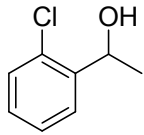

**3i**

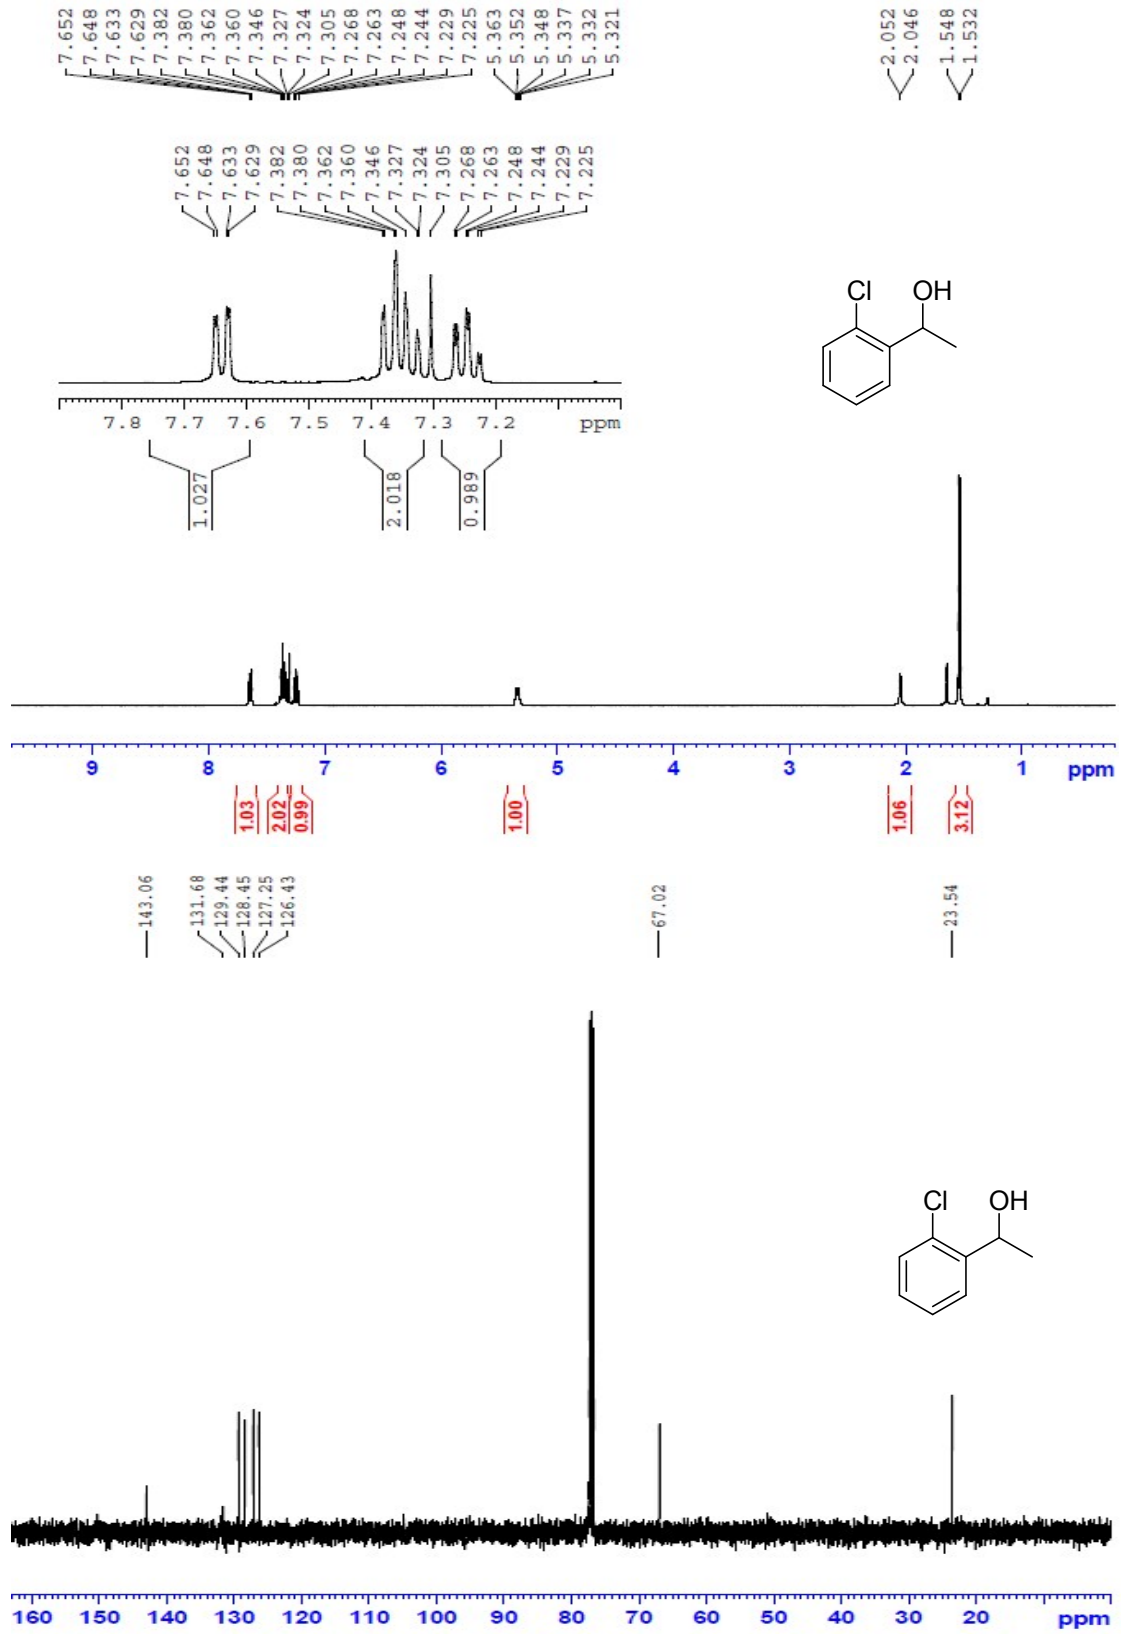

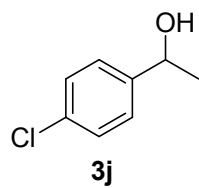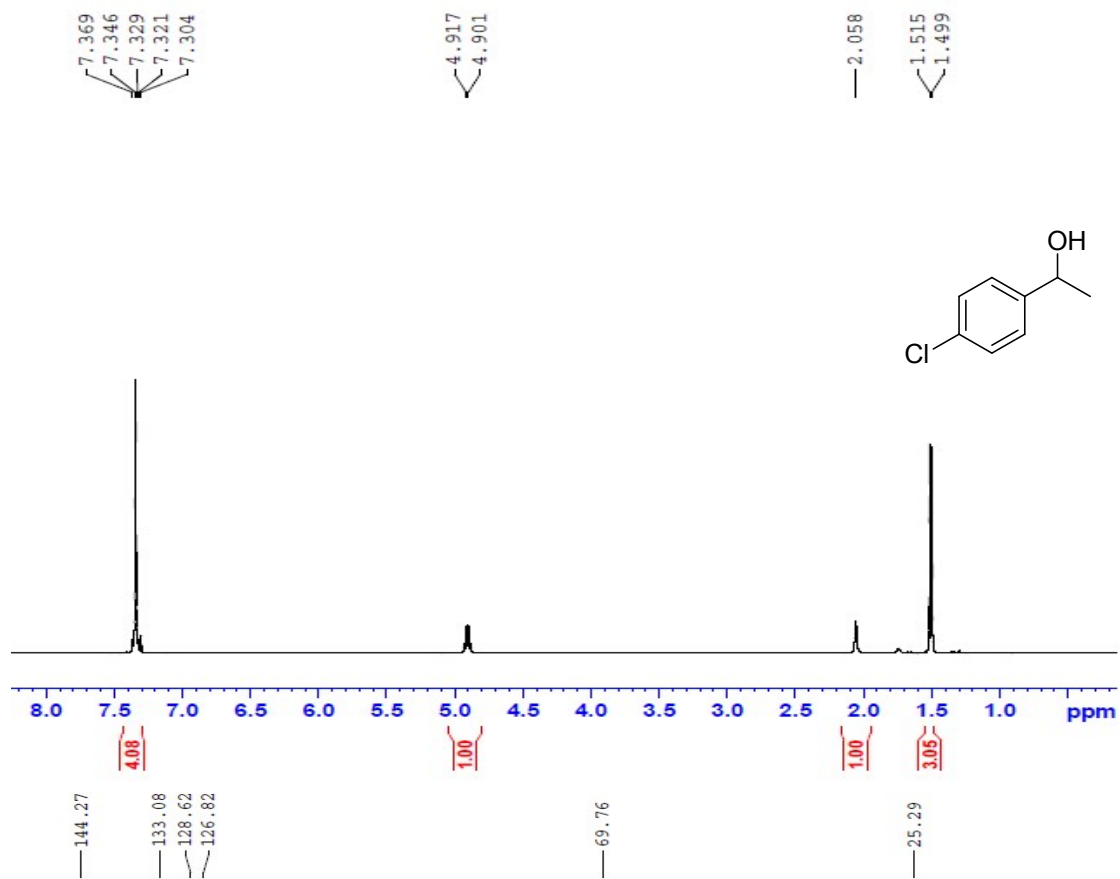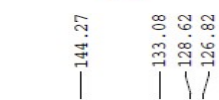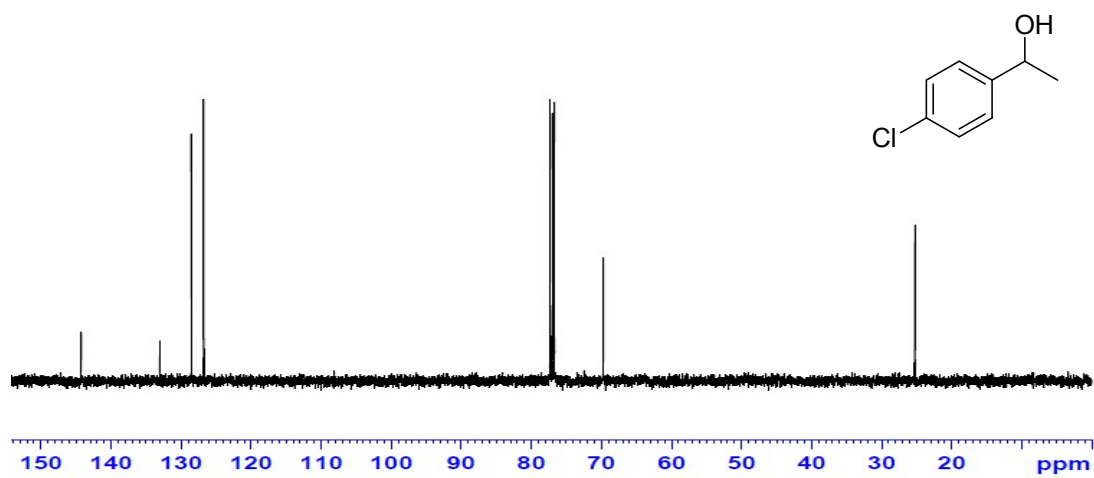

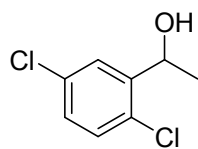

3k

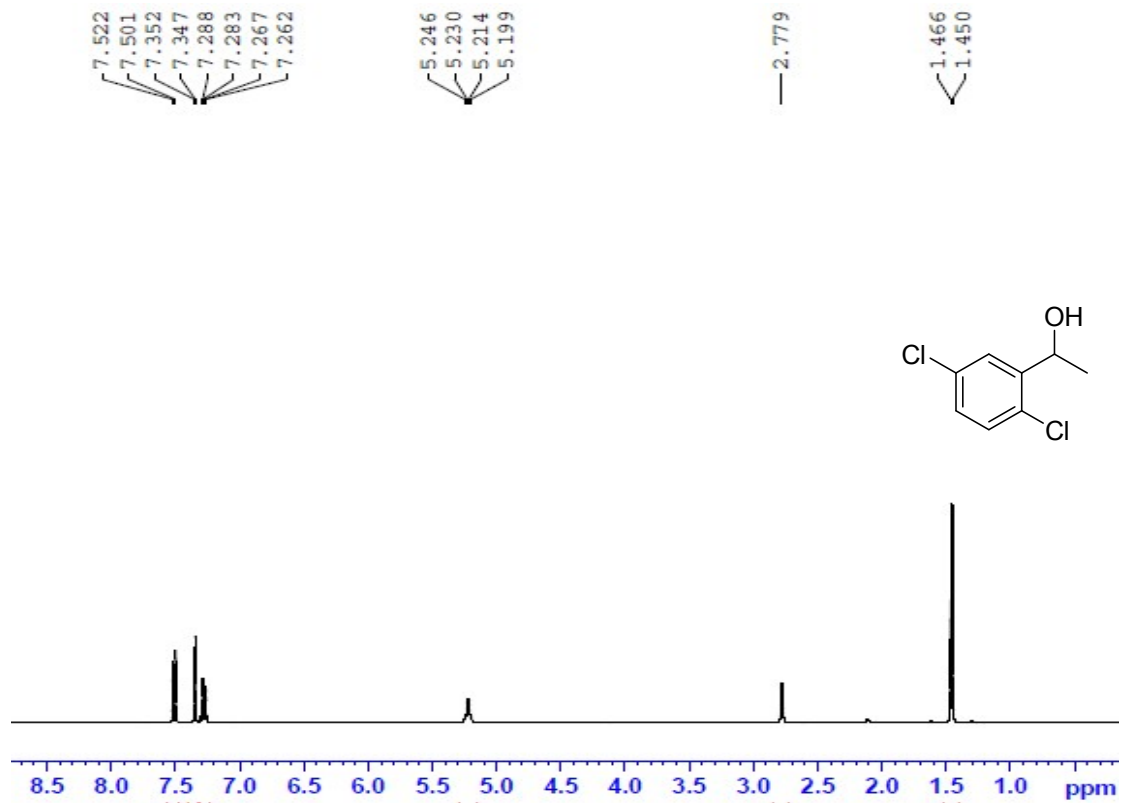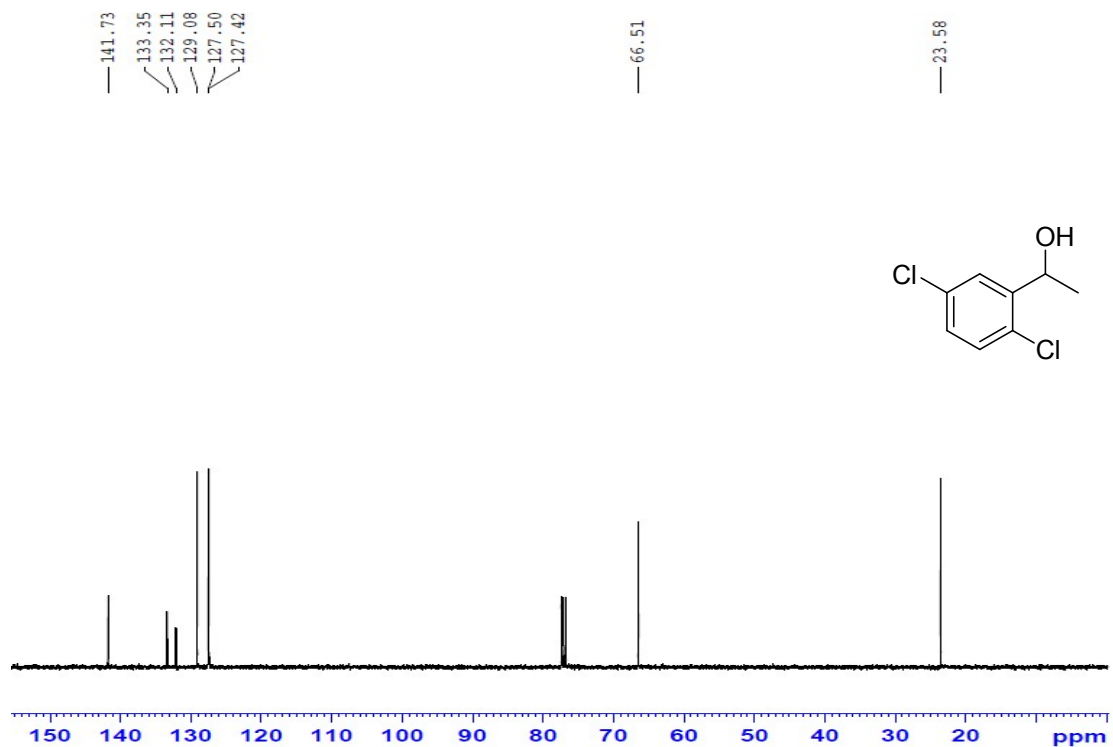

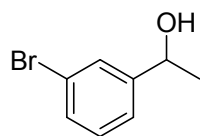

**31**

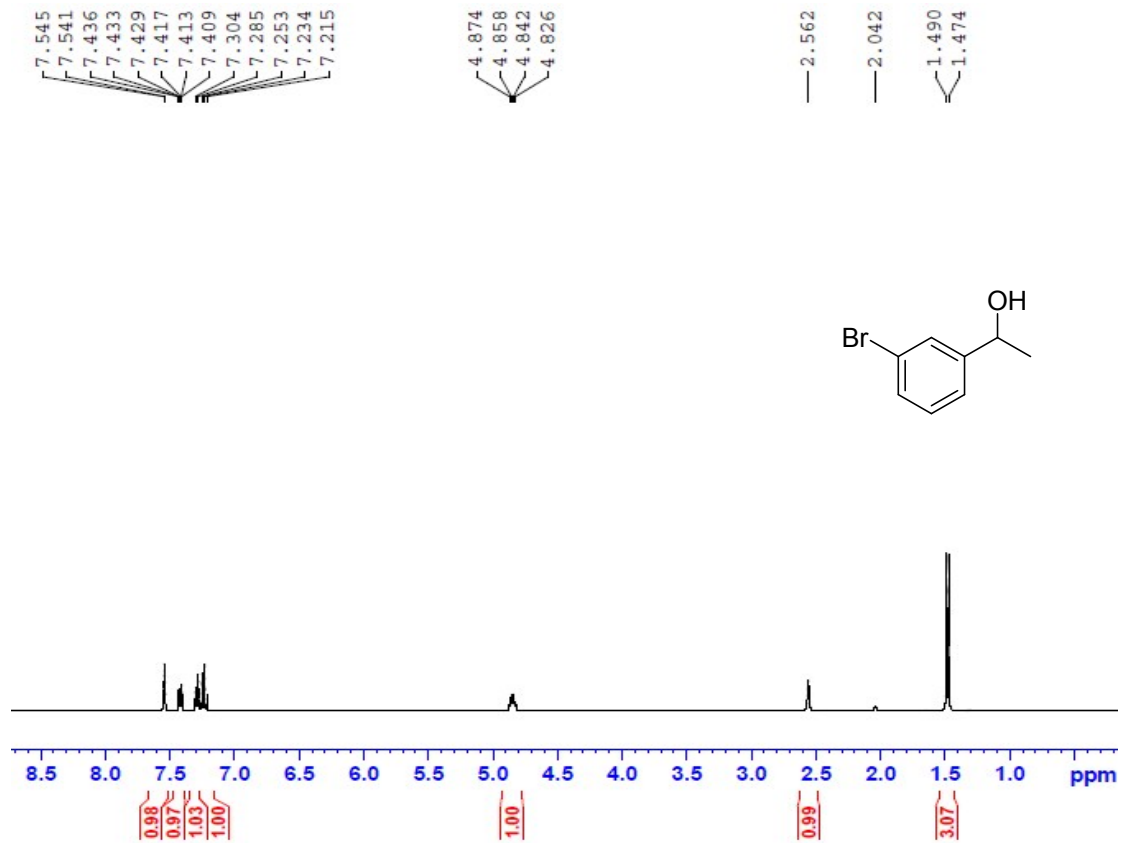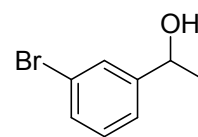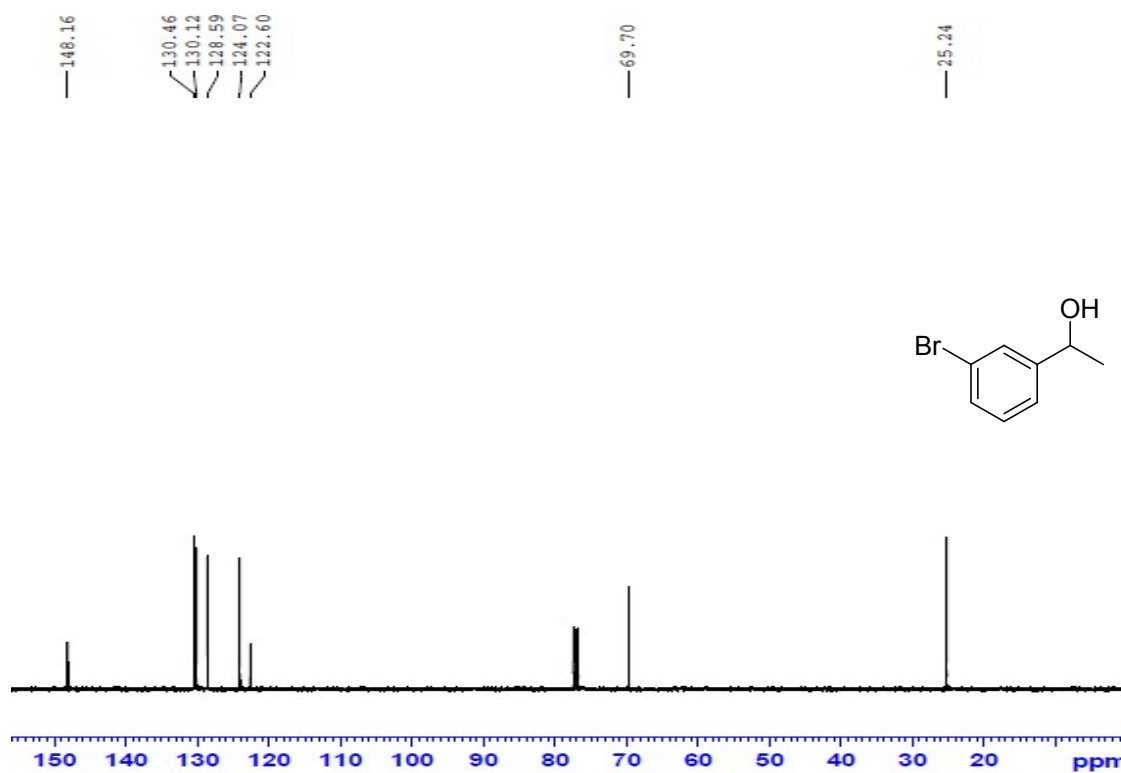

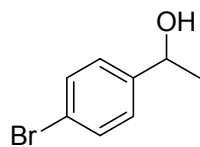

**3m**

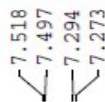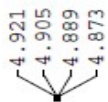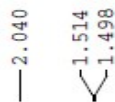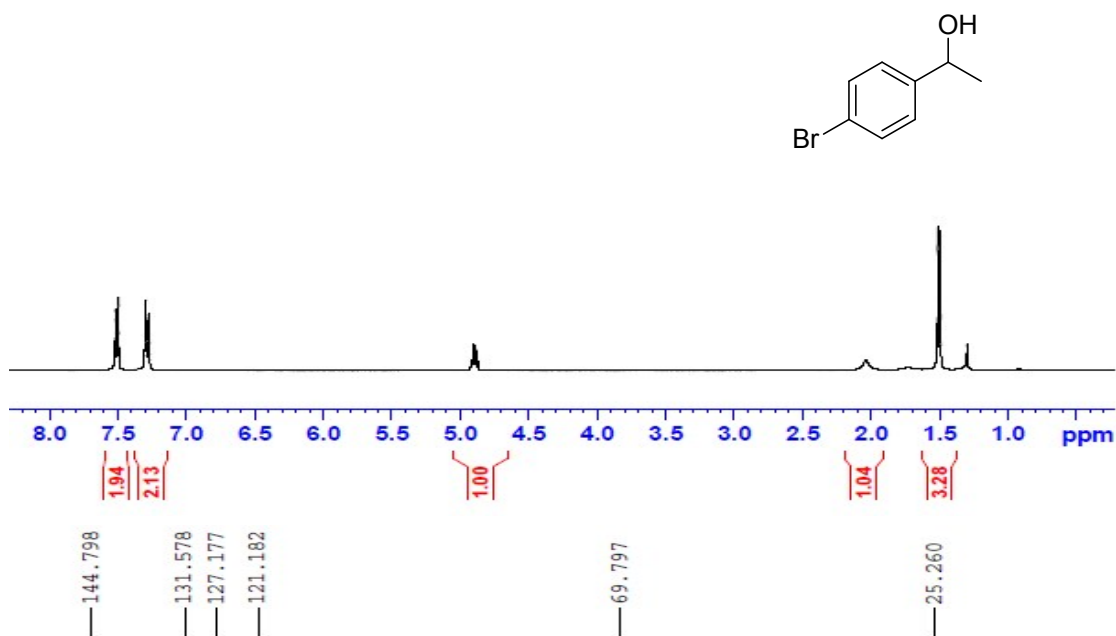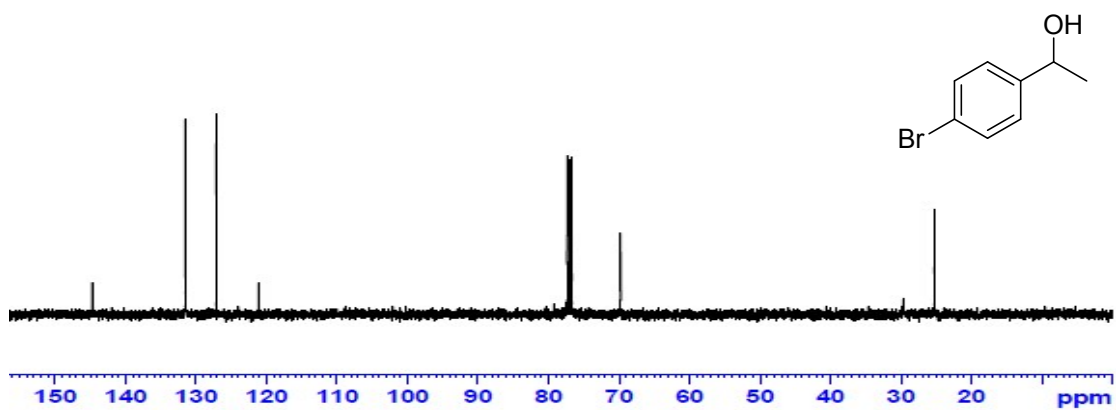

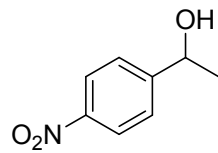

**3n**

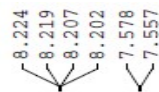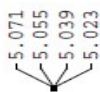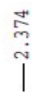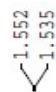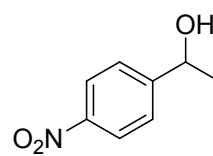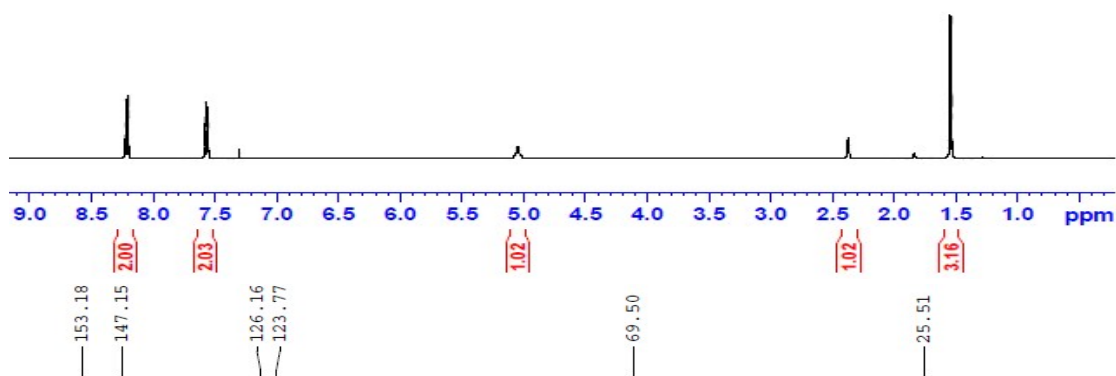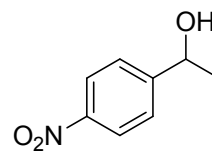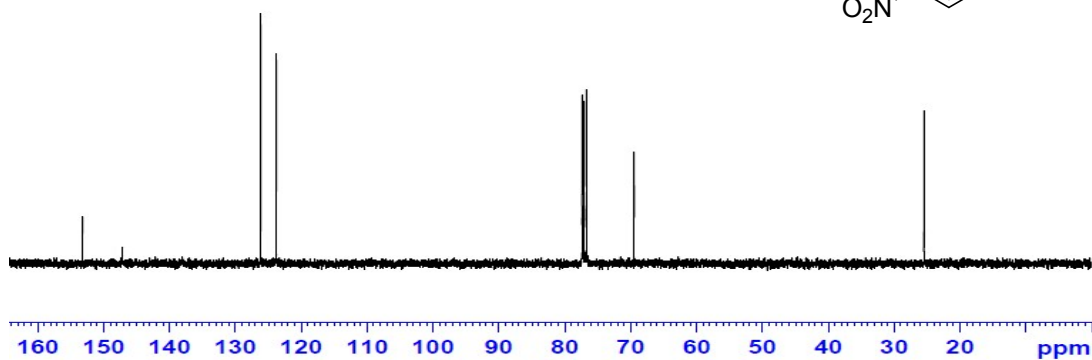



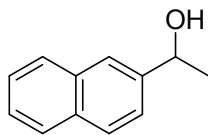

3o

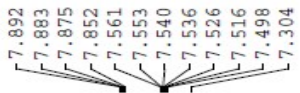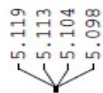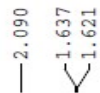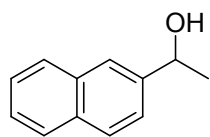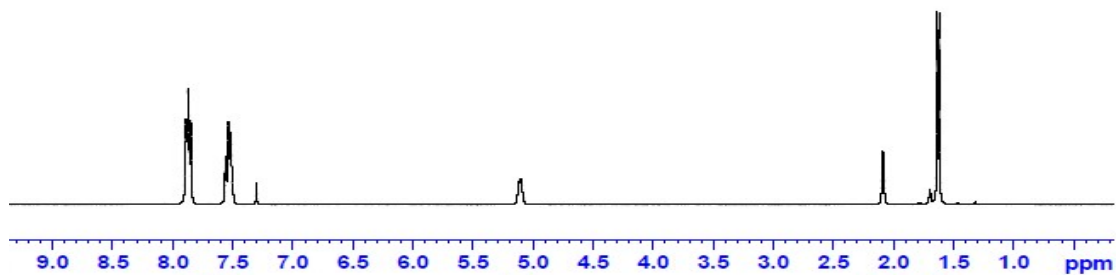

4.01

2.98

1.00

1.02

3.10

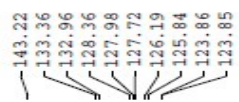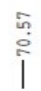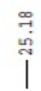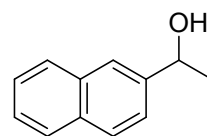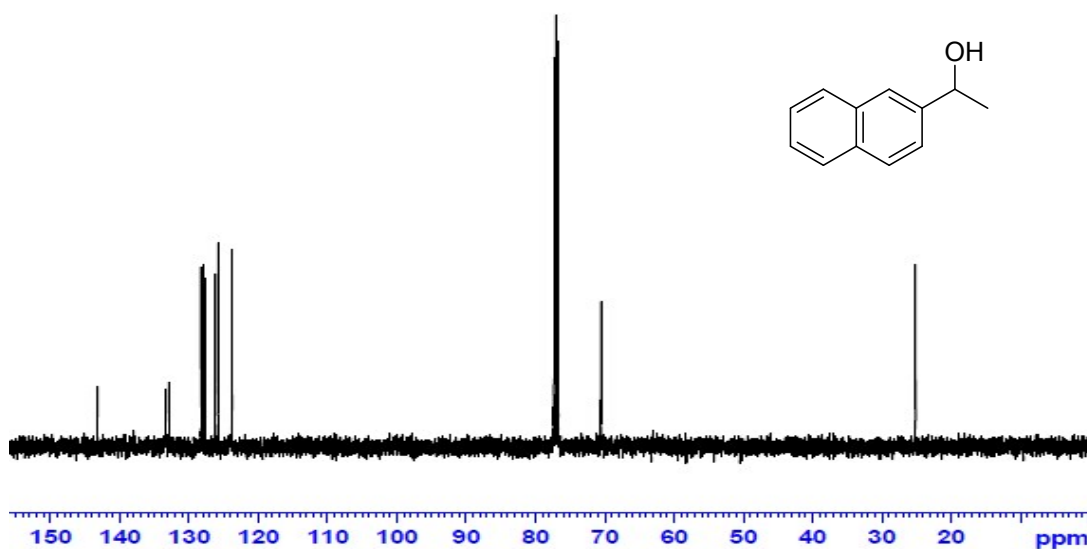

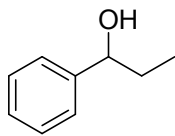

3p

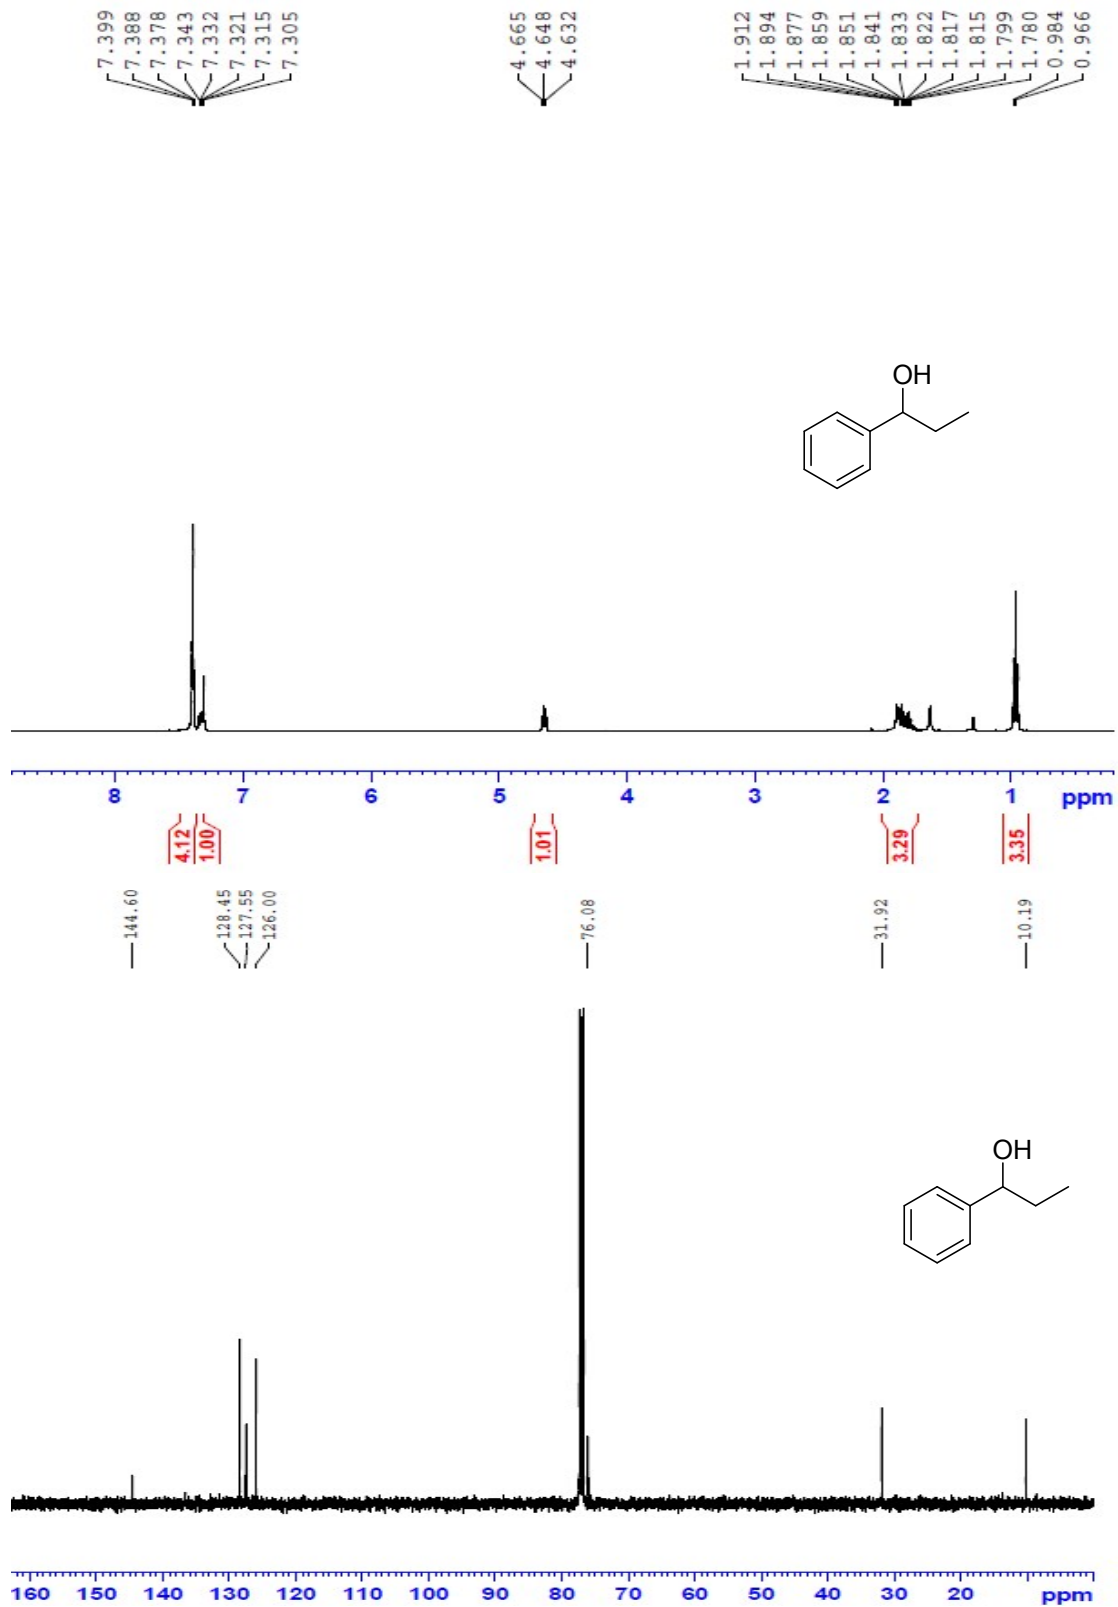

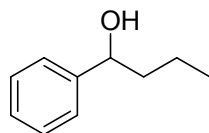

3q

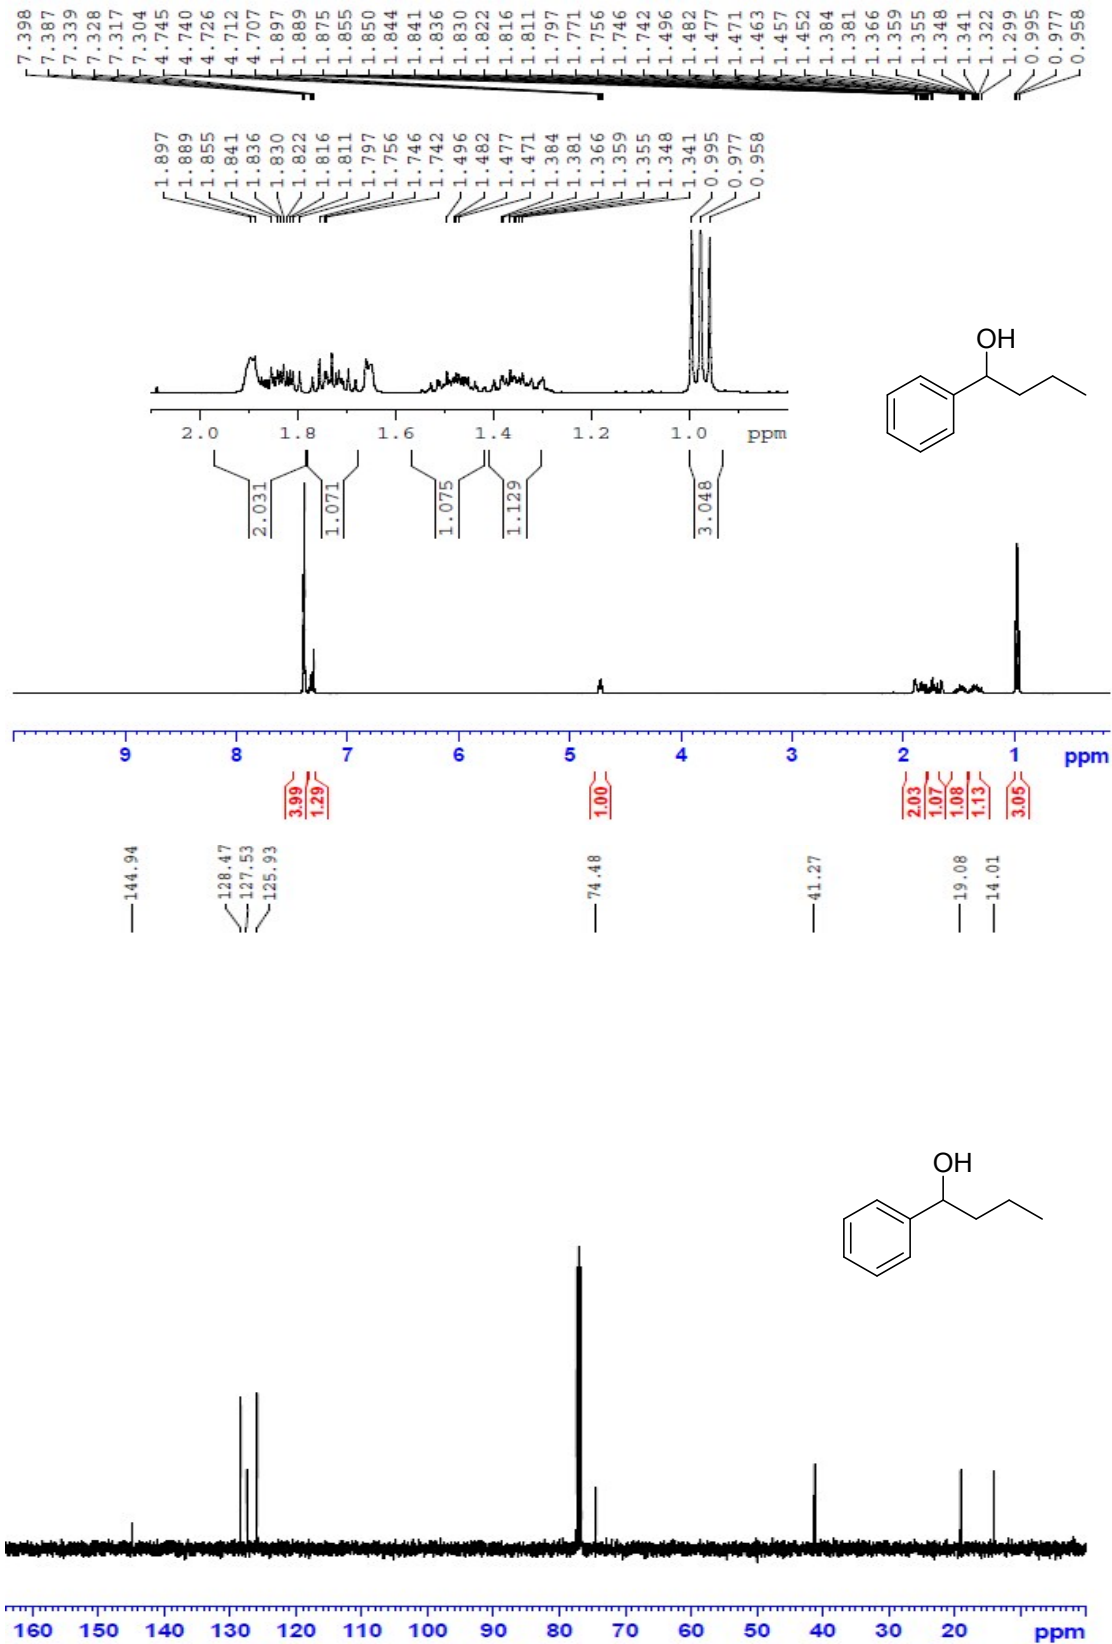

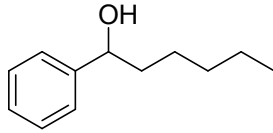

**3r**

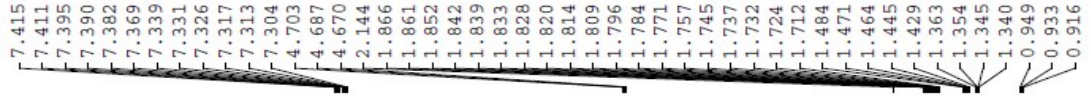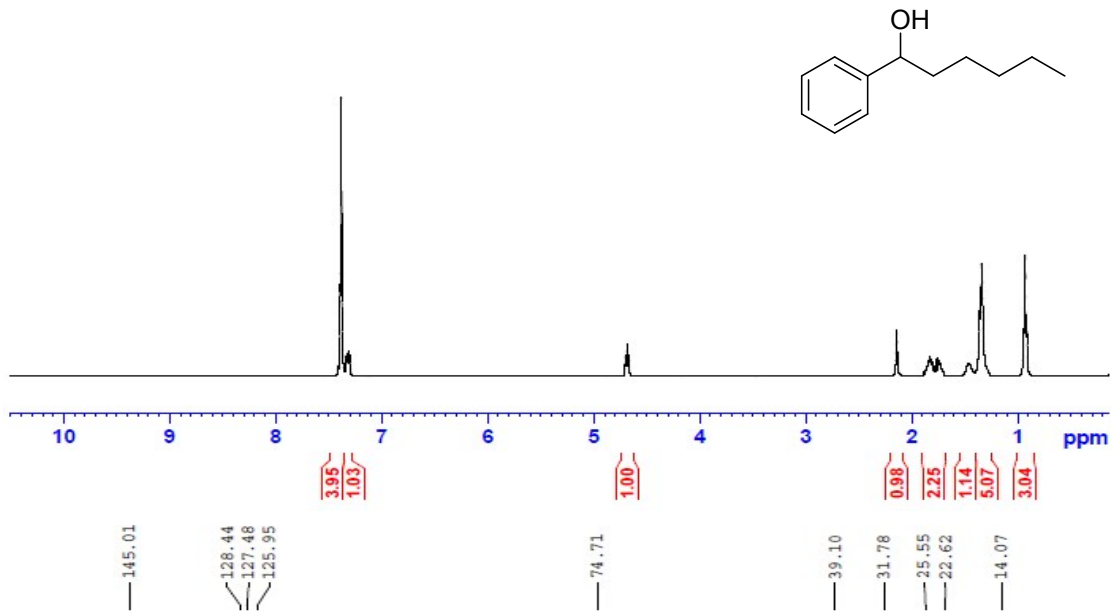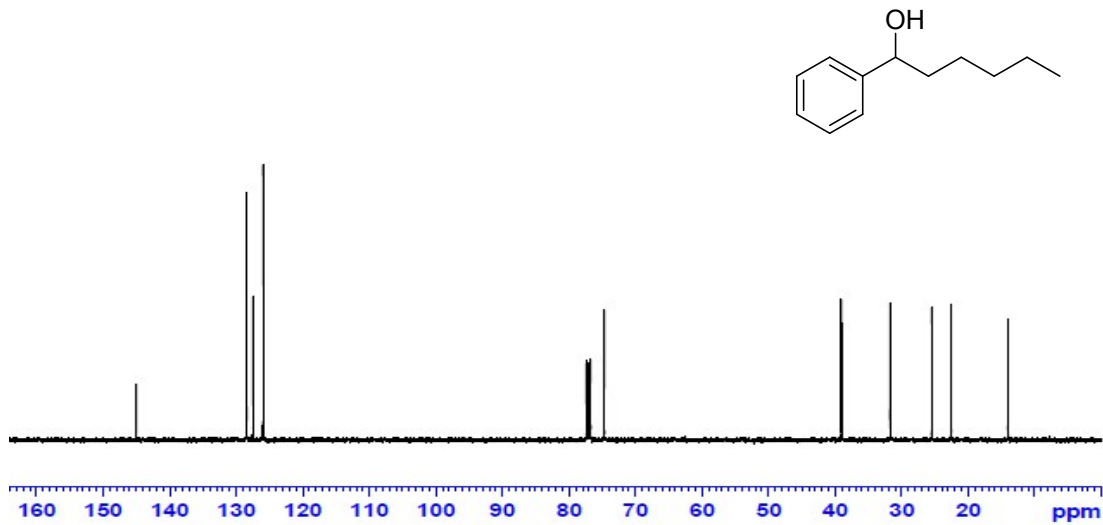

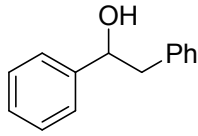

3s

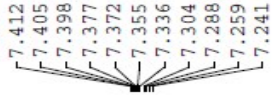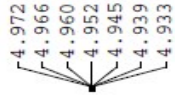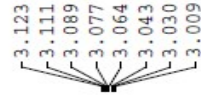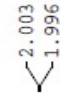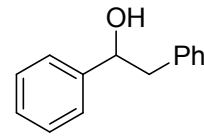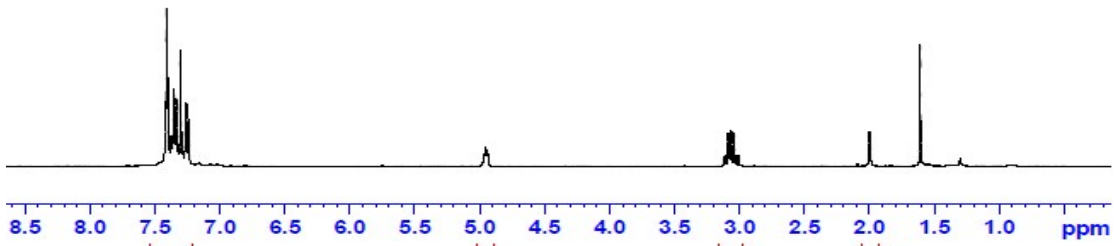

11.78

1.00

2.03

0.97

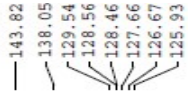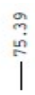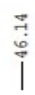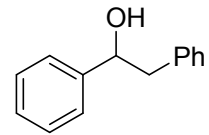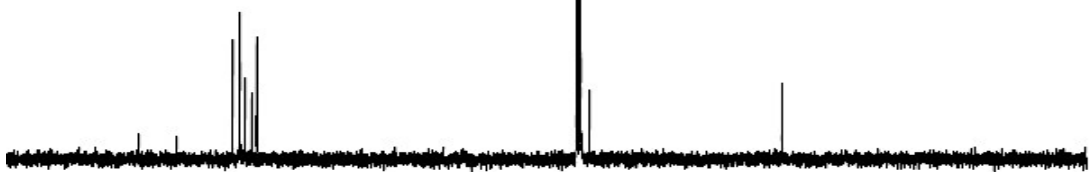

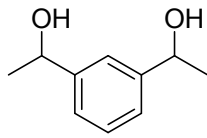

**3t**

7.393  
7.378  
7.350  
7.330  
7.313  
7.304  
7.265  
7.247  
7.244

4.881  
4.865  
4.849  
4.833

2.789

1.494  
1.478

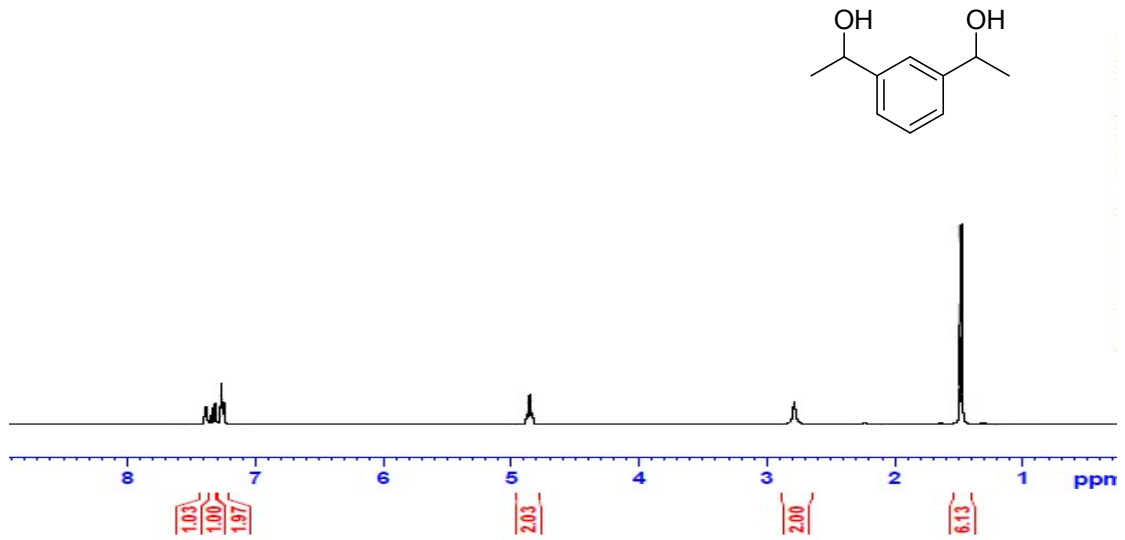

146.13  
146.10  
128.56  
128.55  
124.56  
124.52  
122.51  
122.39

70.29  
70.26

25.15  
25.10

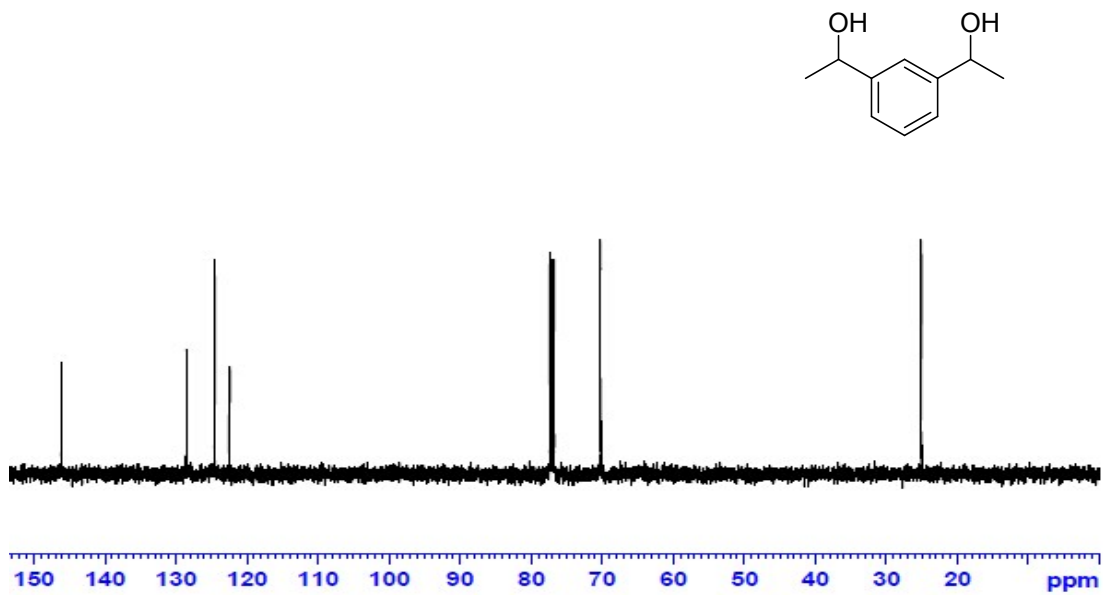

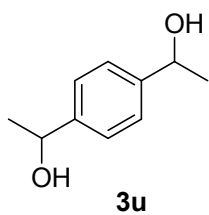

7.389

4.951  
4.935  
4.919  
4.903

2.033  
1.535  
1.519

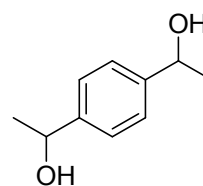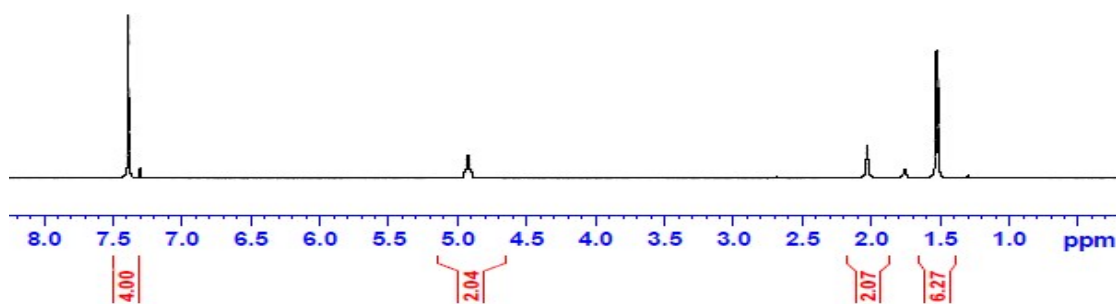

145.077

125.594

70.188  
70.167

25.158

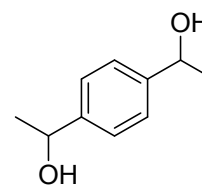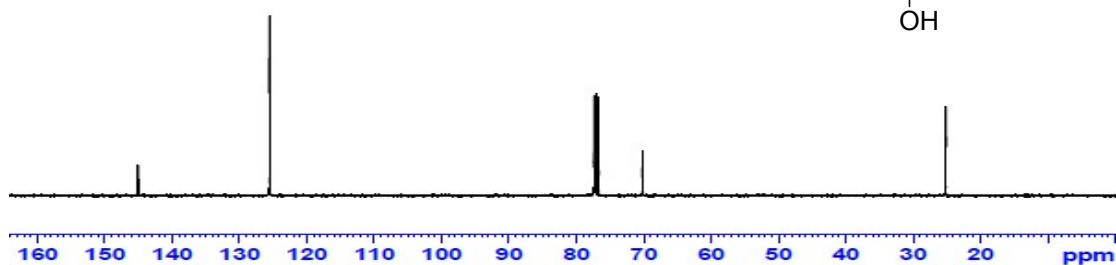

## 8. HPLC Spectra of the Products

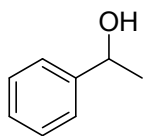

| Peak | Ret Time [min] | Area    | % Area | Height | Type |
|------|----------------|---------|--------|--------|------|
| 1    | 11.465         | 2112025 | 50.01  | 117887 | bb   |
| 2    | 13.865         | 2117372 | 49.99  | 101264 | bb   |

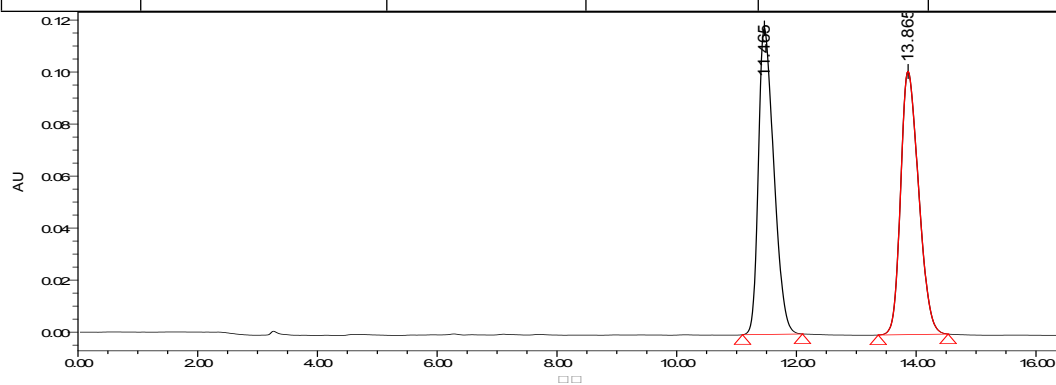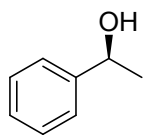



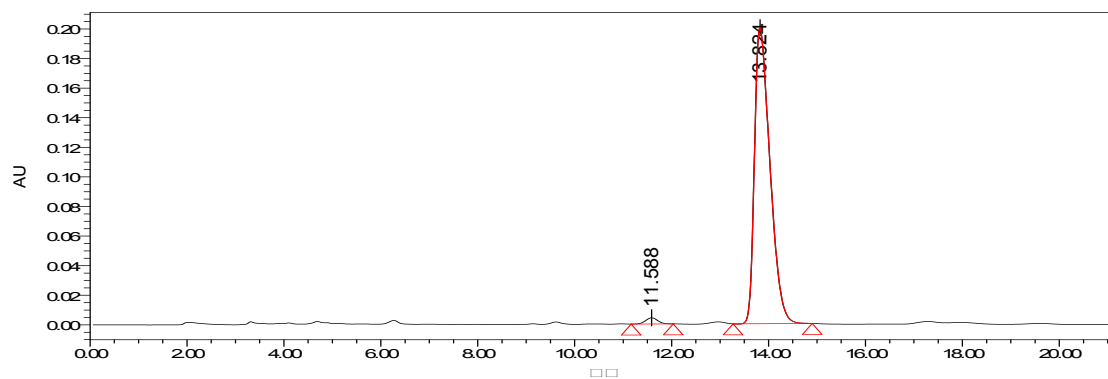

| Peak | Ret Time [min] | Area    | % Area | Height | Type |
|------|----------------|---------|--------|--------|------|
| 1    | 11.588         | 71718   | 1.59   | 4175   | bb   |
| 2    | 13.824         | 4439245 | 98.41  | 200542 | bb   |

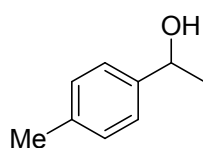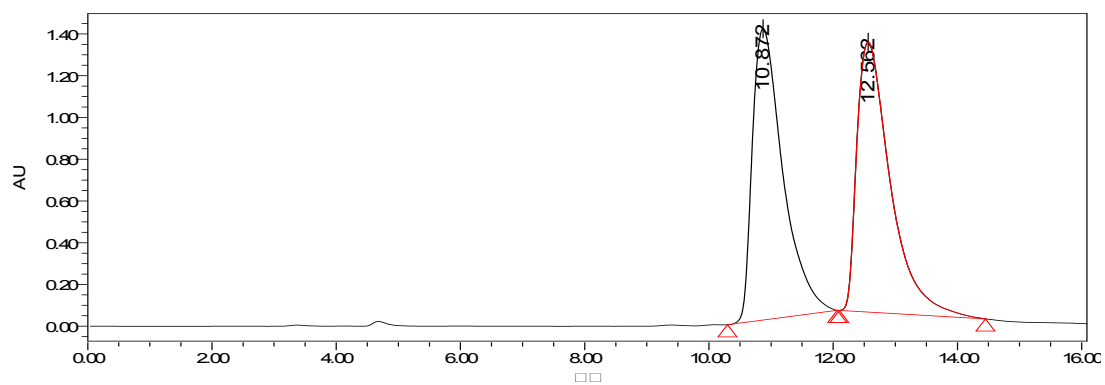

| Peak | Ret Time [min] | Area     | % Area | Height  | Type |
|------|----------------|----------|--------|---------|------|
| 1    | 10.872         | 47797307 | 49.64  | 1396857 | bb   |
| 2    | 12.562         | 48496006 | 50.36  | 1293156 | bb   |

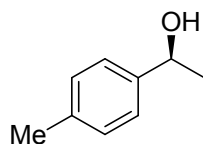

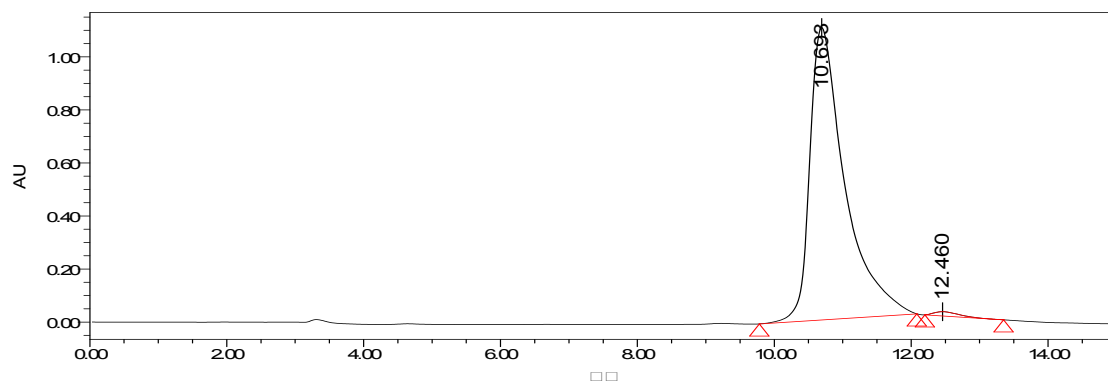

| Peak | Ret Time [min] | Area     | % Area | Height  | Type |
|------|----------------|----------|--------|---------|------|
| 1    | 10.693         | 39225918 | 98.96  | 1103203 | bb   |
| 2    | 12.460         | 414183   | 1.04   | 16069   | bb   |

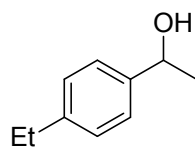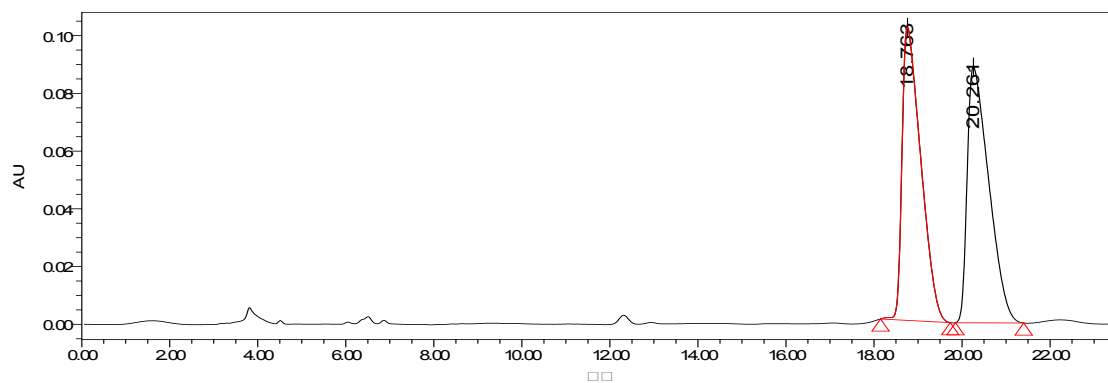

| Peak | Ret Time [min] | Area    | % Area | Height | Type |
|------|----------------|---------|--------|--------|------|
| 1    | 18.763         | 2965481 | 49.56  | 101097 | bb   |
| 2    | 20.261         | 3017731 | 50.44  | 88696  | bb   |

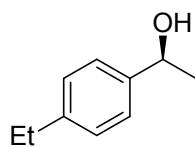

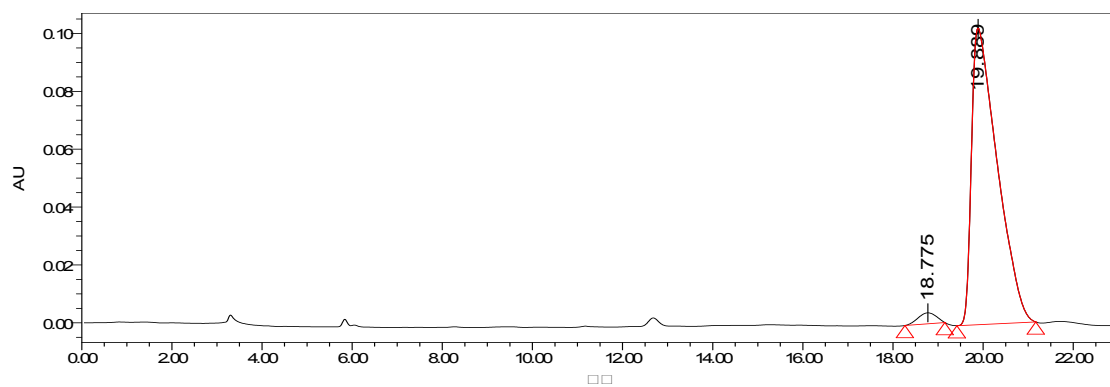

|   | Ret Time [min] | Area    | % Area | Height | Type |
|---|----------------|---------|--------|--------|------|
| 1 | 18.775         | 142626  | 3.38   | 4444   | bb   |
| 2 | 19.889         | 4078714 | 96.62  | 102607 | bb   |

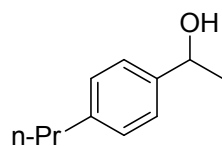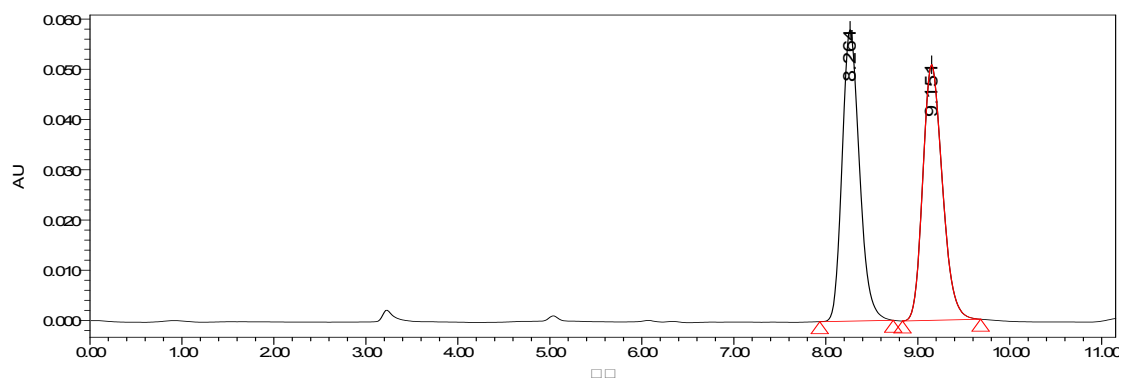

| Peak | Ret Time [min] | Area   | % Area | Height | Type |
|------|----------------|--------|--------|--------|------|
| 1    | 8.264          | 763658 | 49.94  | 58071  | bb   |
| 2    | 9.151          | 765462 | 50.06  | 51064  | bb   |

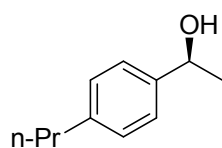

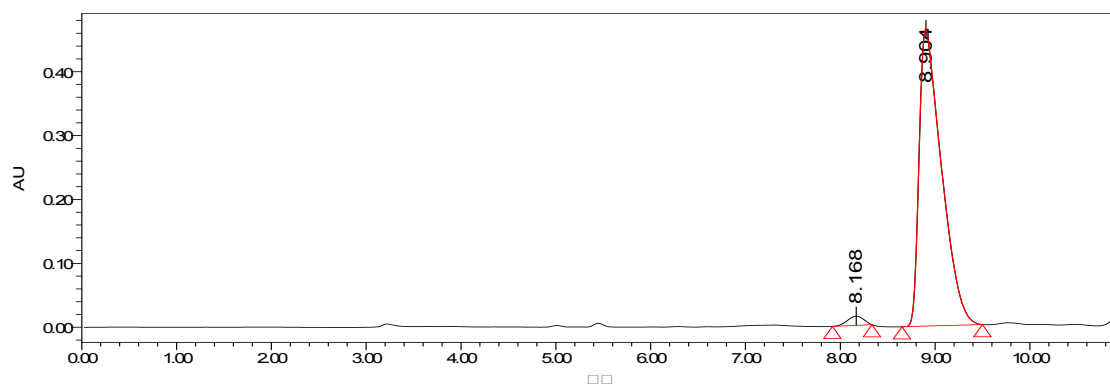

| Peak | Ret Time [min] | Area    | % Area | Height | Type |
|------|----------------|---------|--------|--------|------|
| 1    | 8.168          | 213466  | 2.74   | 16206  | bb   |
| 2    | 8.904          | 7588006 | 97.26  | 466505 | bb   |

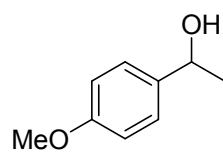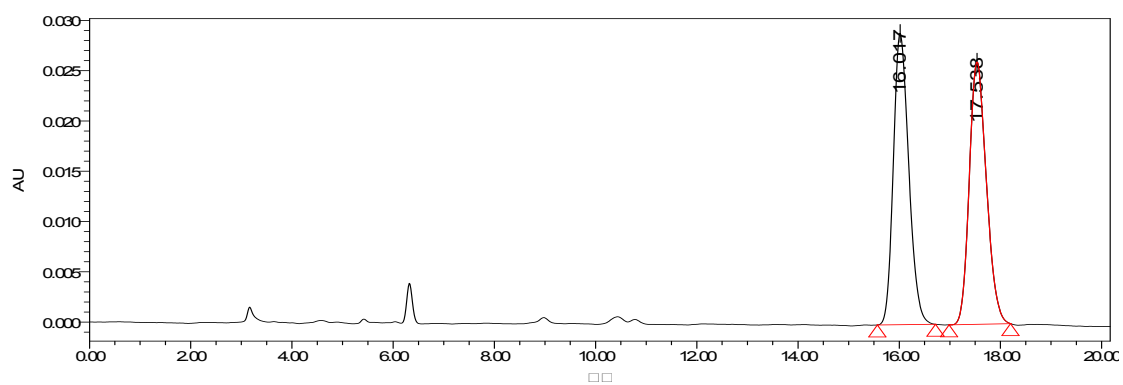

| Peak | Ret Time [min] | Area   | % Area | Height | Type |
|------|----------------|--------|--------|--------|------|
| 1    | 16.017         | 613243 | 49.81  | 28964  | bb   |
| 2    | 17.538         | 617984 | 50.19  | 26171  | bb   |

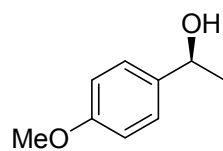

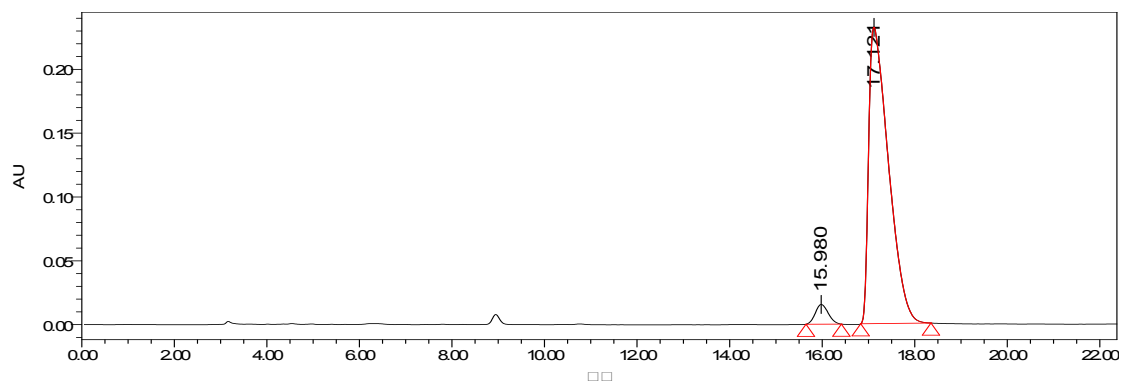

| Peak | Ret Time [min] | Area    | % Area | Height | Type |
|------|----------------|---------|--------|--------|------|
| 1    | 15.980         | 291644  | 4.04   | 15260  | bb   |
| 2    | 17.121         | 6926491 | 95.96  | 232829 | bb   |

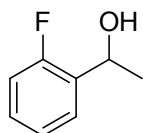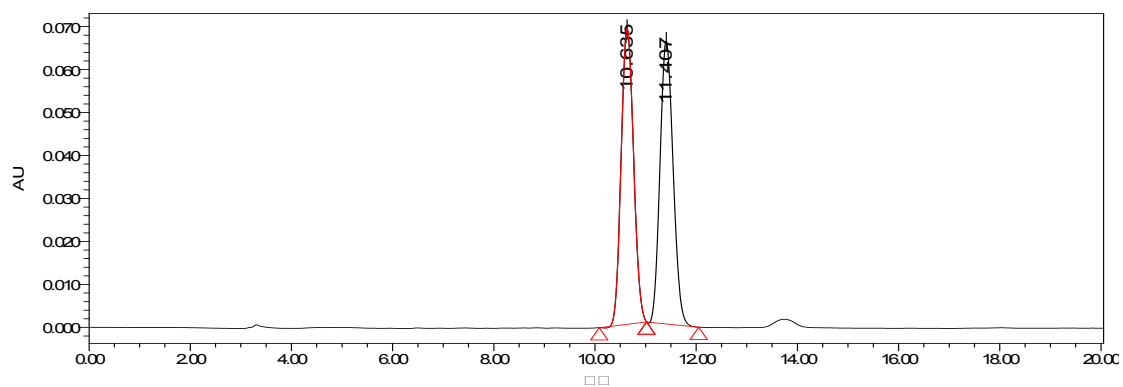

| Peak | Ret Time [min] | Area    | % Area | Height | Type |
|------|----------------|---------|--------|--------|------|
| 1    | 10.635         | 1175759 | 49.76  | 68837  | bb   |
| 2    | 11.407         | 1187210 | 50.24  | 65875  | bb   |

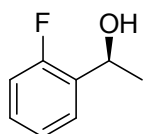

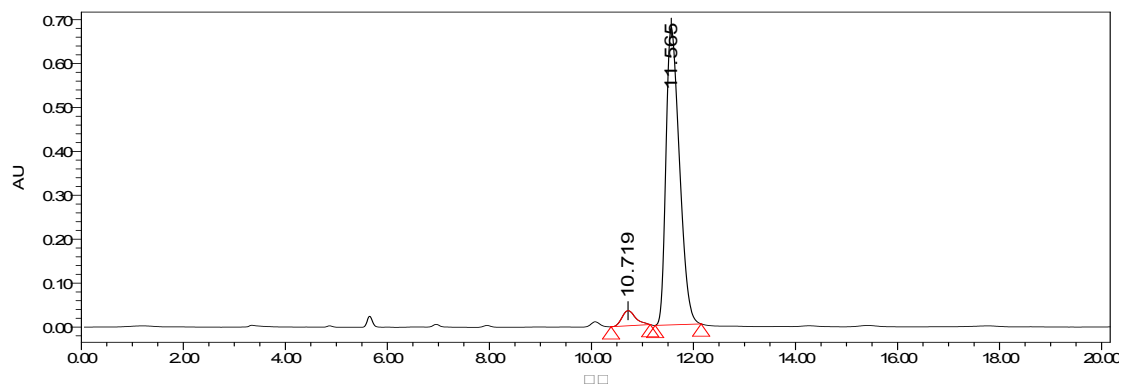

| Peak | Ret Time [min] | Area     | % Area | Height | Type |
|------|----------------|----------|--------|--------|------|
| 1    | 10.719         | 636640   | 4.81   | 34249  | bb   |
| 2    | 11.565         | 12606704 | 95.19  | 678865 | bb   |

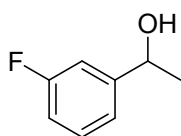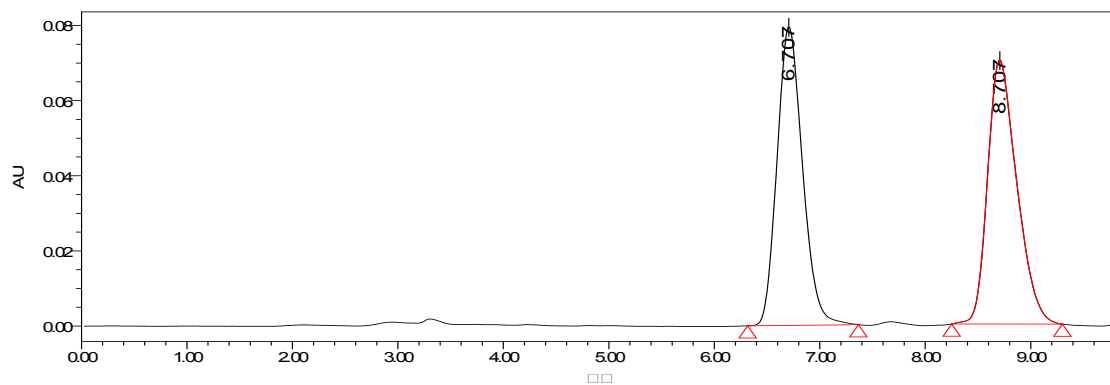

| Peak | Ret Time [min] | Area    | % Area | Height | Type |
|------|----------------|---------|--------|--------|------|
| 1    | 6.707          | 1334049 | 49.68  | 79580  | bb   |
| 2    | 8.707          | 1351358 | 50.32  | 70314  | bb   |

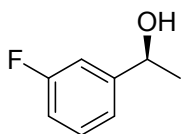

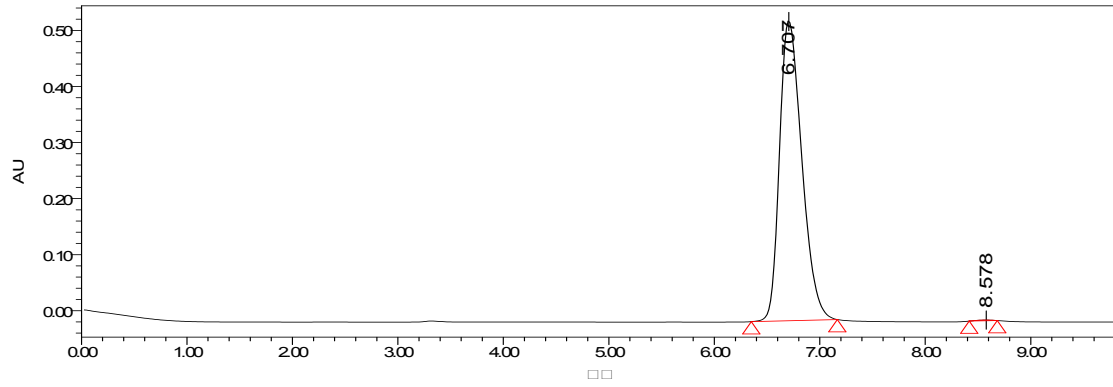

| Peak | Ret Time [min] | Area    | % Area | Height | Type |
|------|----------------|---------|--------|--------|------|
| 1    | 6.707          | 7926951 | 99.78  | 537269 | bb   |
| 2    | 8.577          | 17115   | 0.22   | 1494   | bb   |

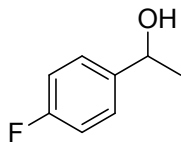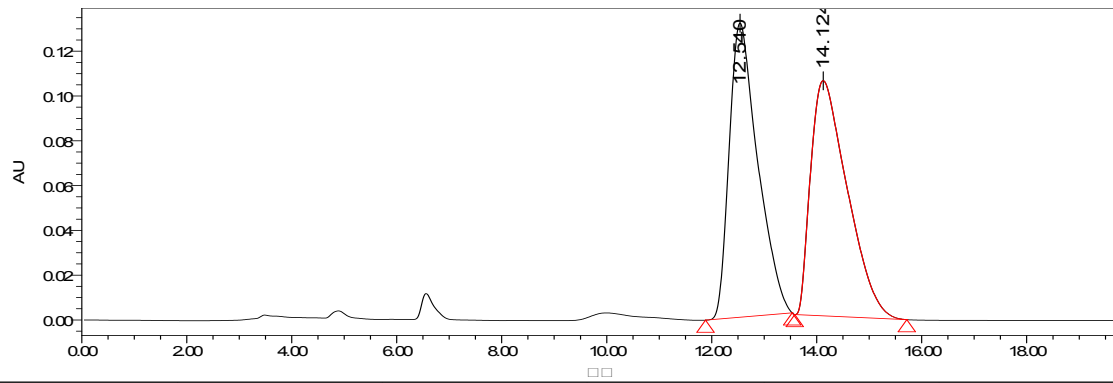

| Peak | Ret Time [min] | Area    | % Area | Height | Type |
|------|----------------|---------|--------|--------|------|
| 1    | 12.540         | 5000295 | 49.76  | 131758 | bb   |
| 2    | 14.124         | 5049143 | 50.24  | 104537 | bb   |

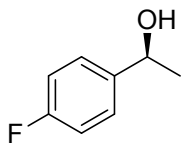

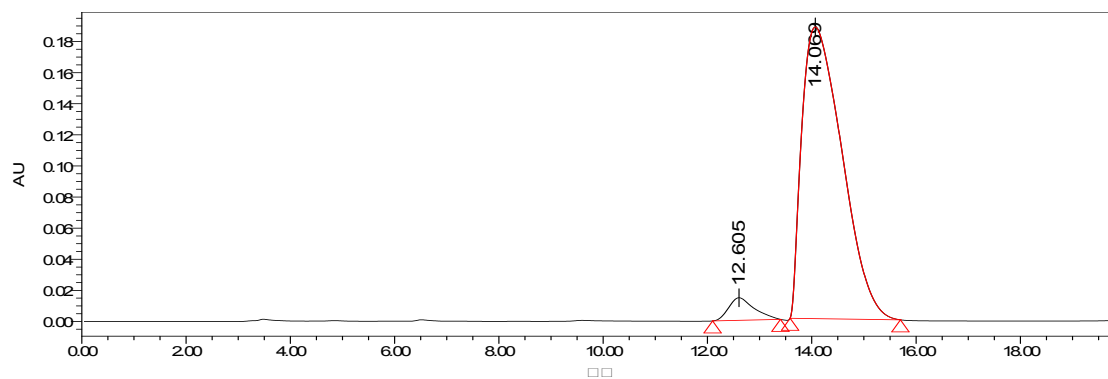

| Peak | Ret Time [min] | Area     | % Area | Height | Type |
|------|----------------|----------|--------|--------|------|
| 1    | 12.605         | 500459   | 4.69   | 14593  | bb   |
| 2    | 14.069         | 10167108 | 95.31  | 188649 | bb   |

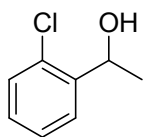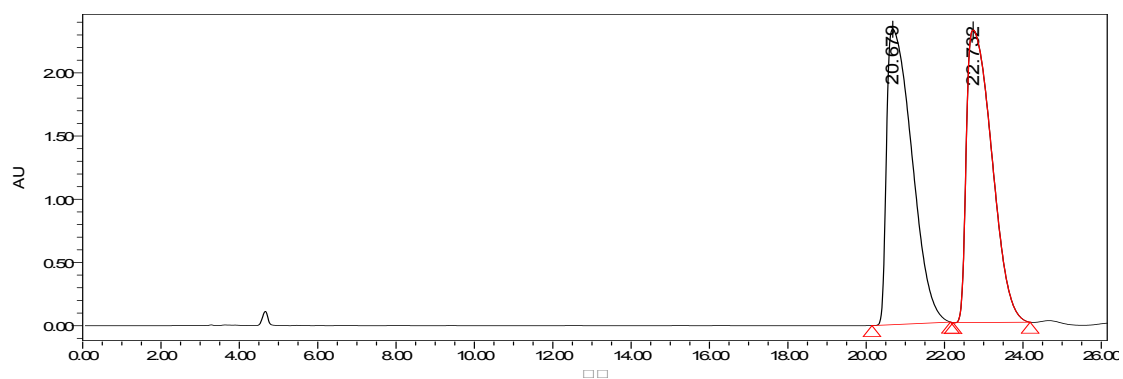

| Peak | Ret Time [min] | Area      | % Area | Height  | Type |
|------|----------------|-----------|--------|---------|------|
| 1    | 20.679         | 104915368 | 50.37  | 2337424 | bb   |
| 2    | 22.732         | 103378528 | 49.63  | 2308887 | bb   |

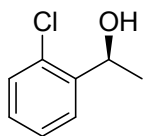



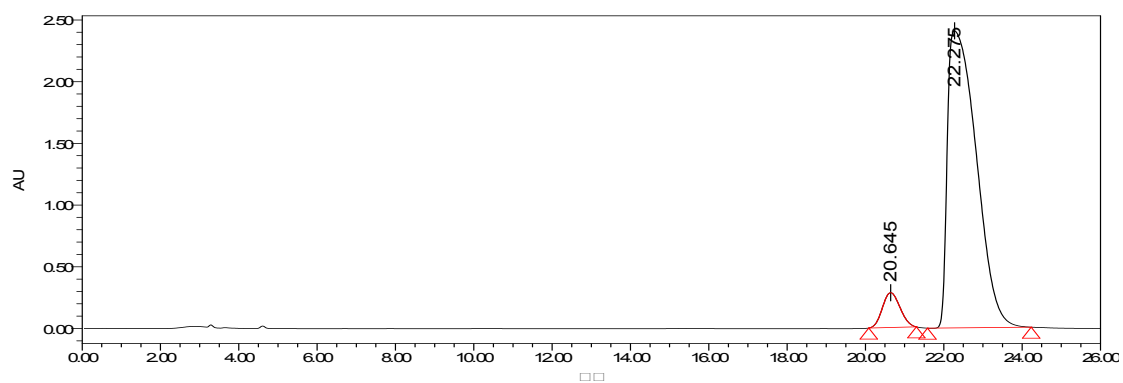

| Peak | Ret Time [min] | Area      | % Area | Height  | Type |
|------|----------------|-----------|--------|---------|------|
| 1    | 20.645         | 8838023   | 6.71   | 282273  | bb   |
| 2    | 22.275         | 122951433 | 93.29  | 2408508 | bb   |

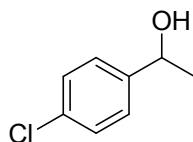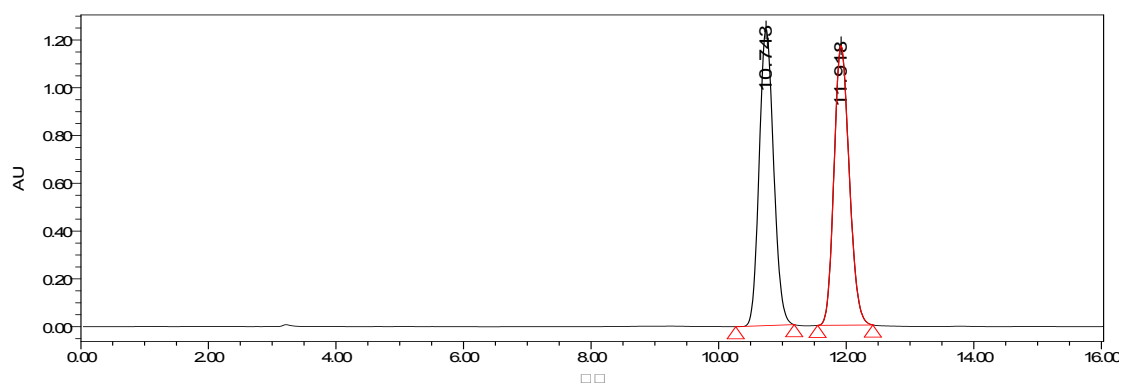

| Peak | Ret Time [min] | Area     | % Area | Height  | Type |
|------|----------------|----------|--------|---------|------|
| 1    | 10.743         | 19596416 | 50.17  | 1242675 | bb   |
| 2    | 11.918         | 19462000 | 49.83  | 1170966 | bb   |

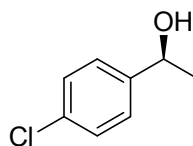

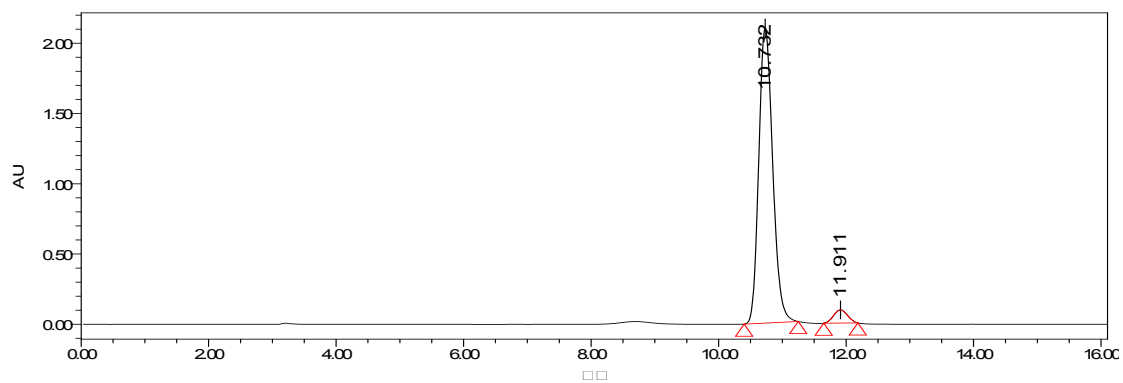

| Peak | Ret Time [min] | Area     | % Area | Height  | Type |
|------|----------------|----------|--------|---------|------|
| 1    | 10.732         | 31867460 | 95.74  | 2101674 | bb   |
| 2    | 11.911         | 1417644  | 4.26   | 93739   | bb   |

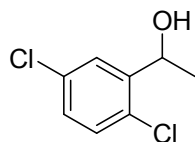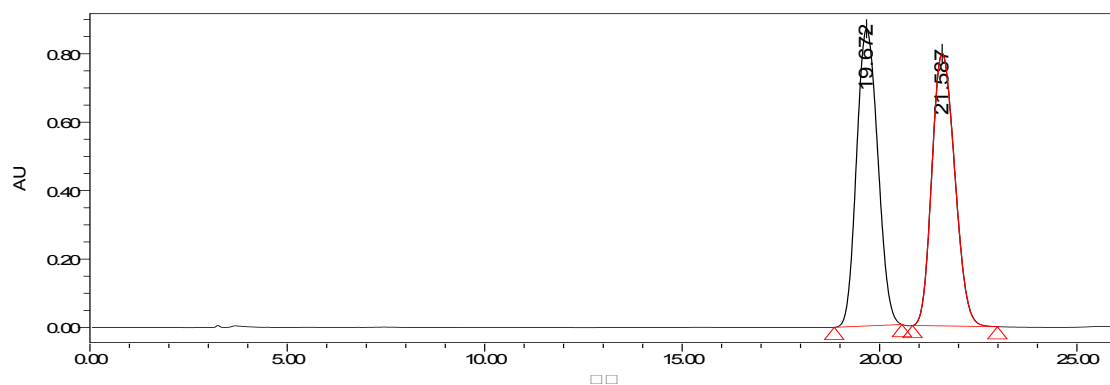

| Peak | Ret Time [min] | Area     | % Area | Height | Type |
|------|----------------|----------|--------|--------|------|
| 1    | 19.672         | 32428901 | 50.34  | 868765 | bb   |
| 2    | 21.587         | 31986547 | 49.66  | 796697 | bb   |

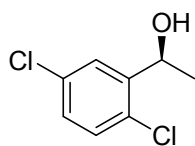

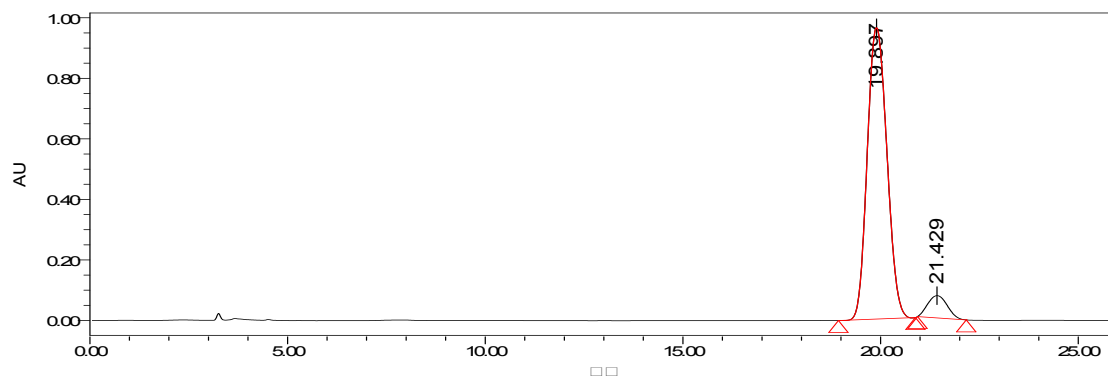

| Peak | Ret Time [min] | Area     | % Area | Height | Type |
|------|----------------|----------|--------|--------|------|
| 1    | 19.897         | 33194269 | 92.92  | 962608 | bb   |
| 2    | 21.429         | 2527357  | 7.08   | 73709  | bb   |

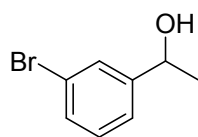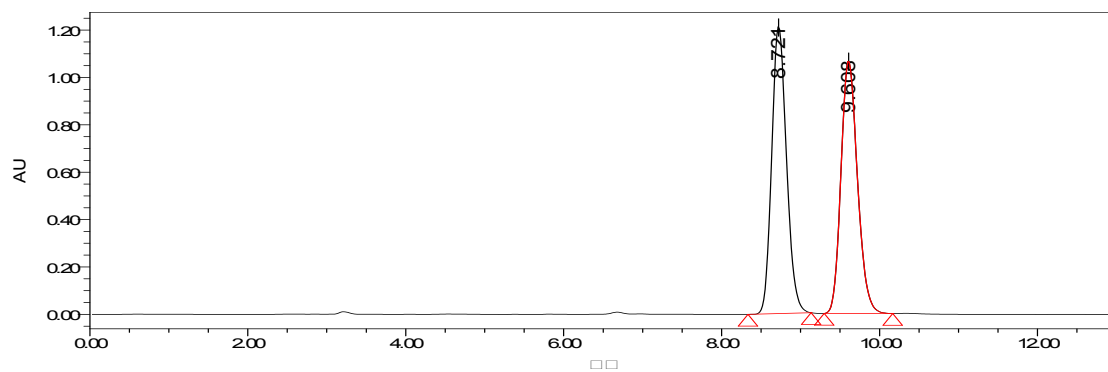

| Peak | Ret Time [min] | Area     | % Area | Height  | Type |
|------|----------------|----------|--------|---------|------|
| 1    | 8.721          | 15787884 | 50.50  | 1212522 | bb   |
| 2    | 9.608          | 15476214 | 49.50  | 1067116 | bb   |

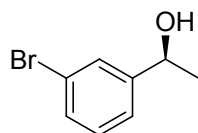

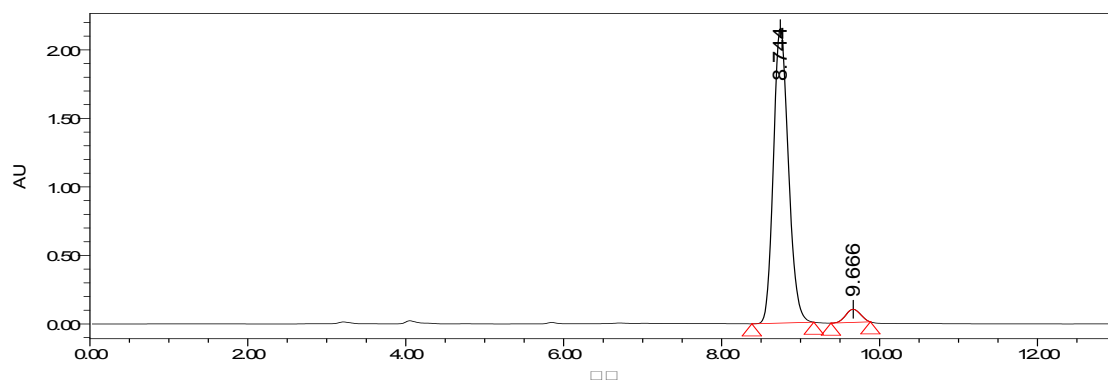

| Peak | Ret Time [min] | Area     | % Area | Height  | Type |
|------|----------------|----------|--------|---------|------|
| 1    | 8.744          | 28360804 | 95.76  | 2155054 | bb   |
| 2    | 9.666          | 1254970  | 4.24   | 96080   | bb   |

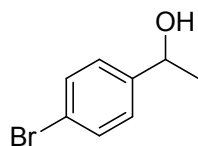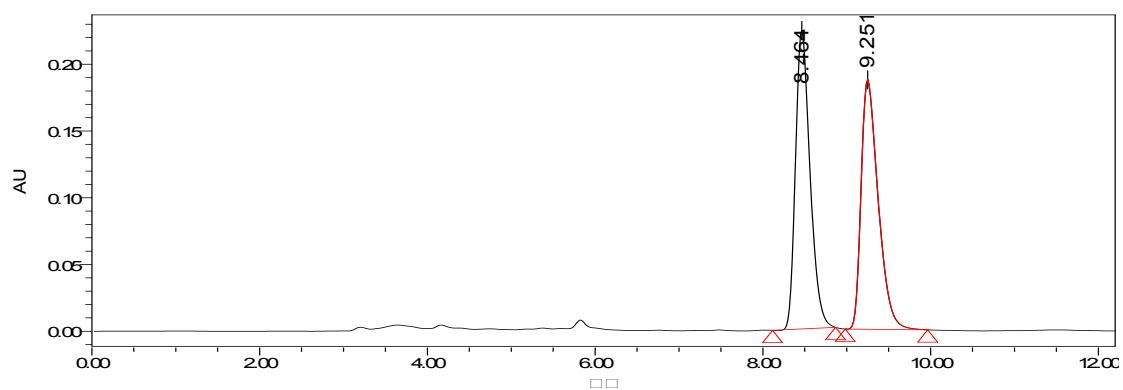

| Peak | Ret Time [min] | Area    | % Area | Height | Type |
|------|----------------|---------|--------|--------|------|
| 1    | 8.464          | 2696239 | 50.55  | 223904 | bb   |
| 2    | 9.251          | 2637677 | 49.45  | 187004 | bb   |

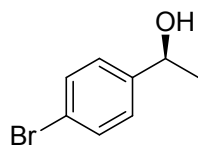

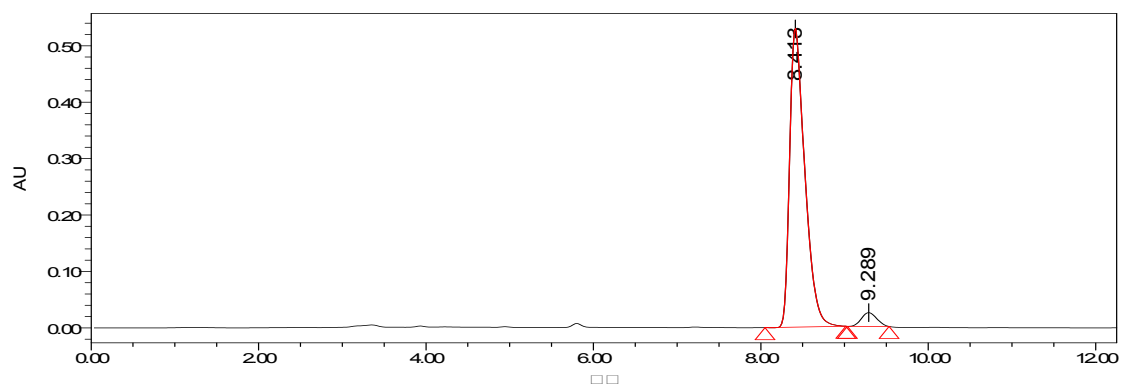

| Peak | Ret Time [min] | Area    | % Area | Height | Type |
|------|----------------|---------|--------|--------|------|
| 1    | 8.413          | 6675249 | 95.55  | 529580 | bb   |
| 2    | 9.289          | 310669  | 4.45   | 24391  | bb   |

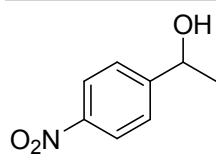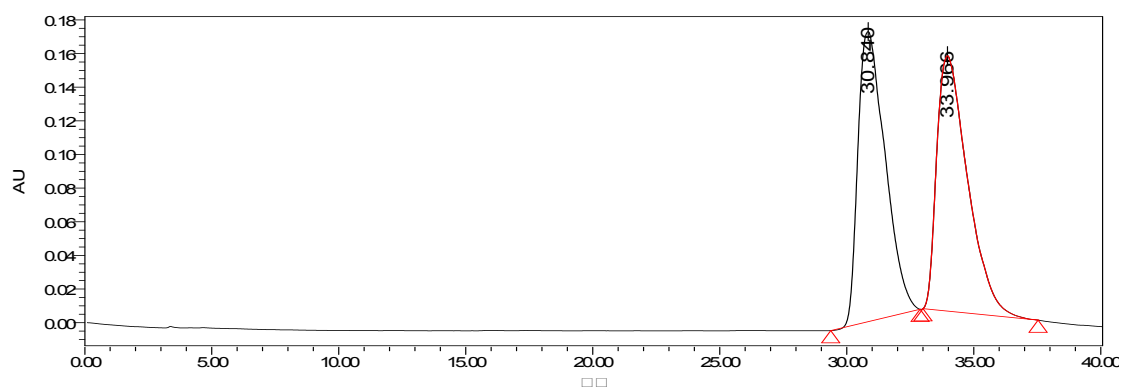

| Peak | Ret Time [min] | Area     | % Area | Height  | Type |
|------|----------------|----------|--------|---------|------|
| 1    | 30.840         | 12842757 | 50.04  | 1724443 | bb   |
| 2    | 33.966         | 12824508 | 49.96  | 151823  | bb   |

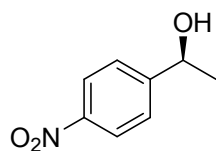

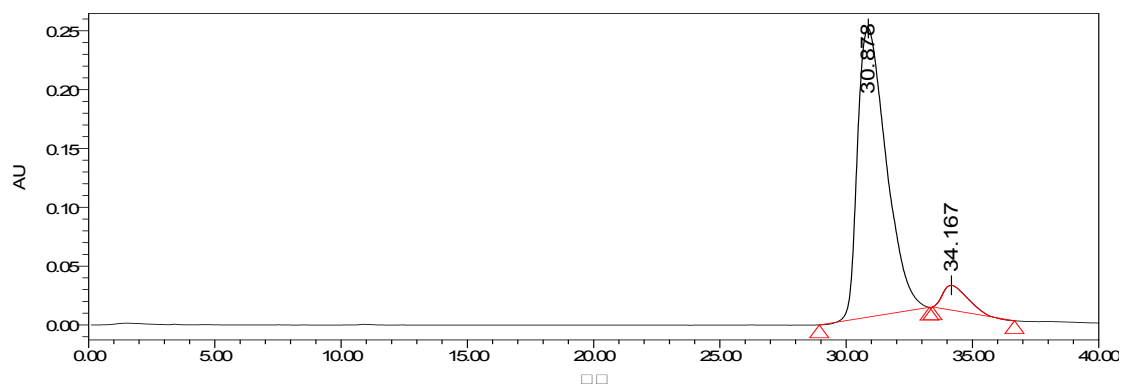

| Peak | Ret Time [min] | Area     | % Area | Height | Type |
|------|----------------|----------|--------|--------|------|
| 1    | 30.878         | 19391229 | 92.89  | 245366 | bb   |
| 2    | 34.167         | 1483753  | 7.11   | 21101  | bb   |

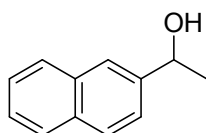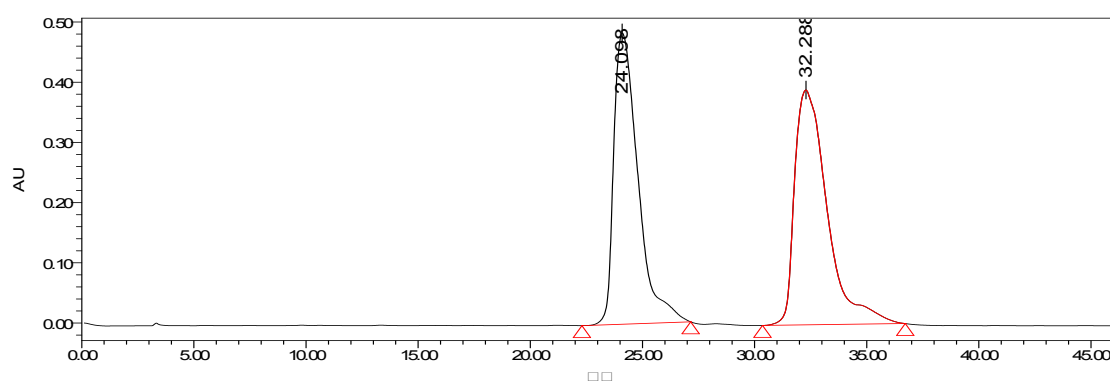

| Peak | Ret Time [min] | Area     | % Area | Height | Type |
|------|----------------|----------|--------|--------|------|
| 1    | 24.098         | 36872753 | 48.60  | 484977 | bb   |
| 2    | 32.288         | 38994136 | 51.40  | 388819 | bb   |

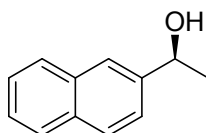

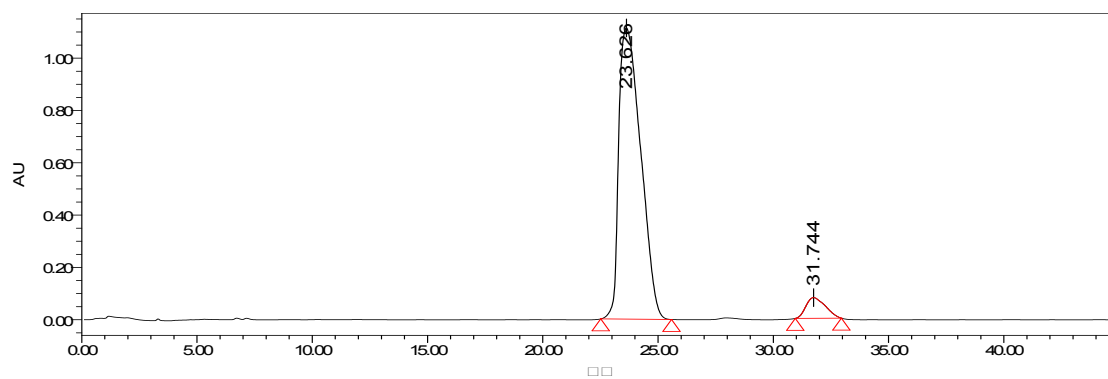

| Peak | Ret Time [min] | Area     | % Area | Height  | Type |
|------|----------------|----------|--------|---------|------|
| 1    | 23.626         | 73451283 | 94.07  | 1113344 | bb   |
| 2    | 31.744         | 4627879  | 5.93   | 79206   | bb   |

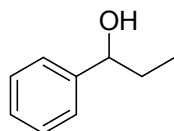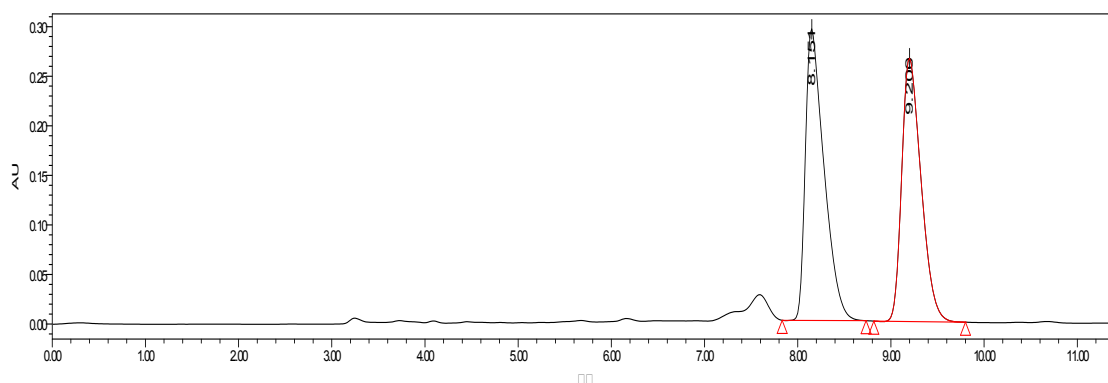

| Peak | Ret Time [min] | Area    | % Area | Height | Type |
|------|----------------|---------|--------|--------|------|
| 1    | 8.151          | 4088101 | 51.68  | 294285 | bb   |
| 2    | 9.200          | 3823016 | 48.32  | 265718 | bb   |

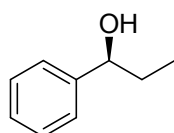

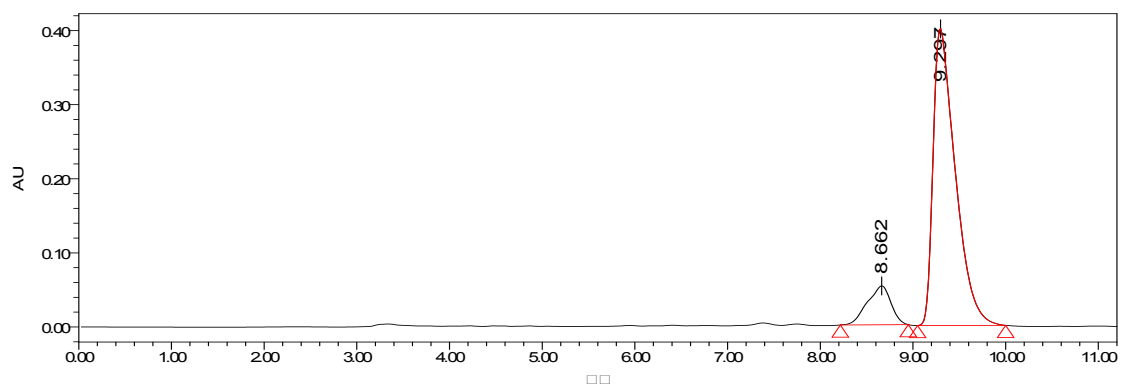

| Peak | Ret Time [min] | Area    | % Area | Height | Type |
|------|----------------|---------|--------|--------|------|
| 1    | 8.662          | 929952  | 12.25  | 52621  | bb   |
| 2    | 9.297          | 6662504 | 87.75  | 400736 | bb   |

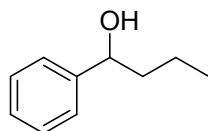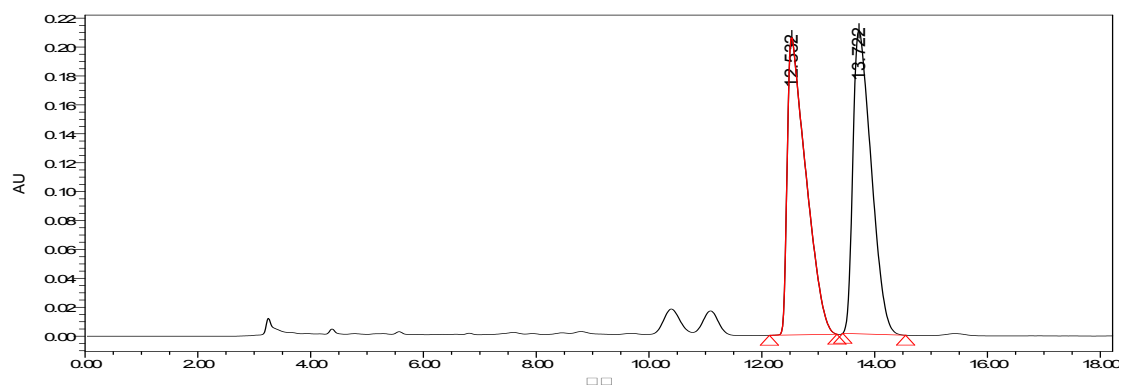

| Peak | Ret Time [min] | Area    | % Area | Height | Type |
|------|----------------|---------|--------|--------|------|
| 1    | 12.532         | 4727313 | 49.90  | 205680 | bb   |
| 2    | 13.722         | 4745623 | 50.10  | 210010 | bb   |

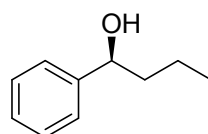



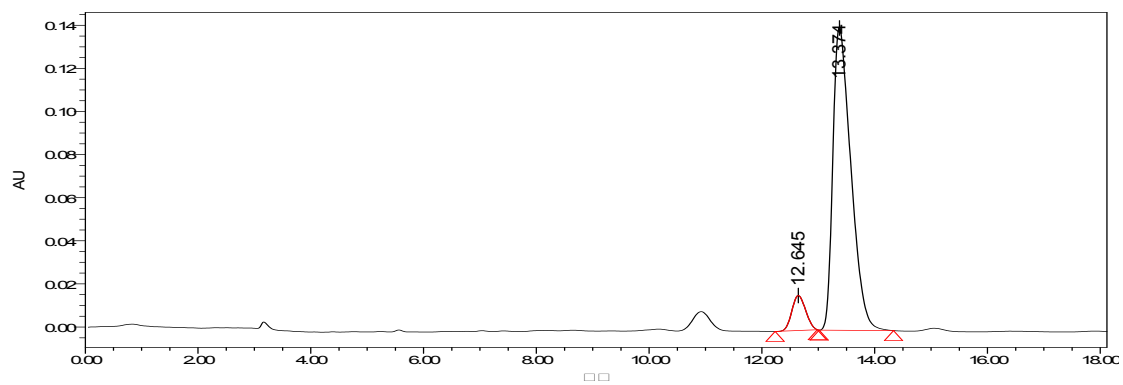

| Peak | Ret Time [min] | Area    | % Area | Height | Type |
|------|----------------|---------|--------|--------|------|
| 1    | 12.645         | 275356  | 8.10   | 16249  | bb   |
| 2    | 13.374         | 3122263 | 91.90  | 140592 | bb   |

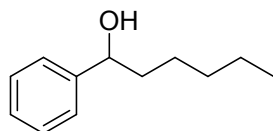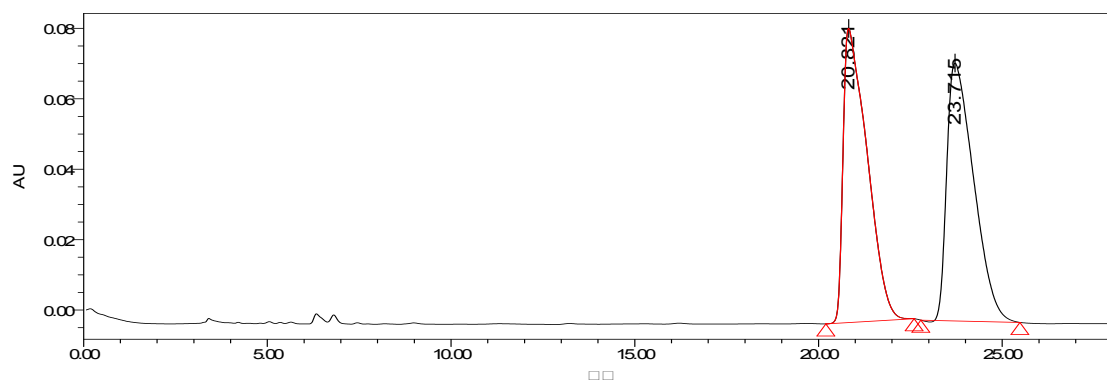

| Peak | Ret Time [min] | Area    | % Area | Height | Type |
|------|----------------|---------|--------|--------|------|
| 1    | 20.821         | 3776543 | 50.34  | 83616  | bb   |
| 2    | 23.715         | 3725105 | 49.66  | 73235  | bb   |

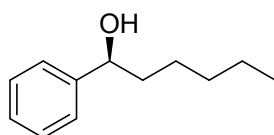

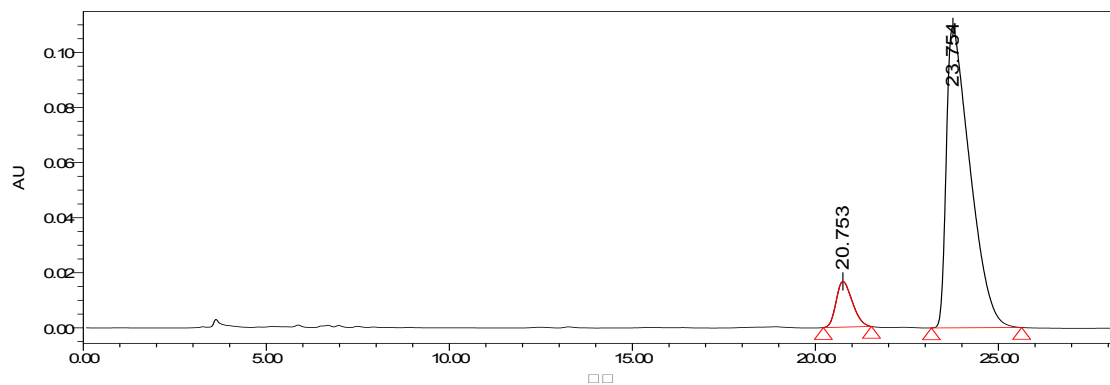

| Peak | Ret Time [min] | Area    | % Area | Height | Type |
|------|----------------|---------|--------|--------|------|
| 1    | 20.753         | 511496  | 9.45   | 16581  | bb   |
| 2    | 23.754         | 4902090 | 90.55  | 109355 | bb   |

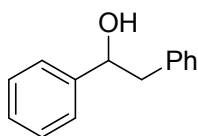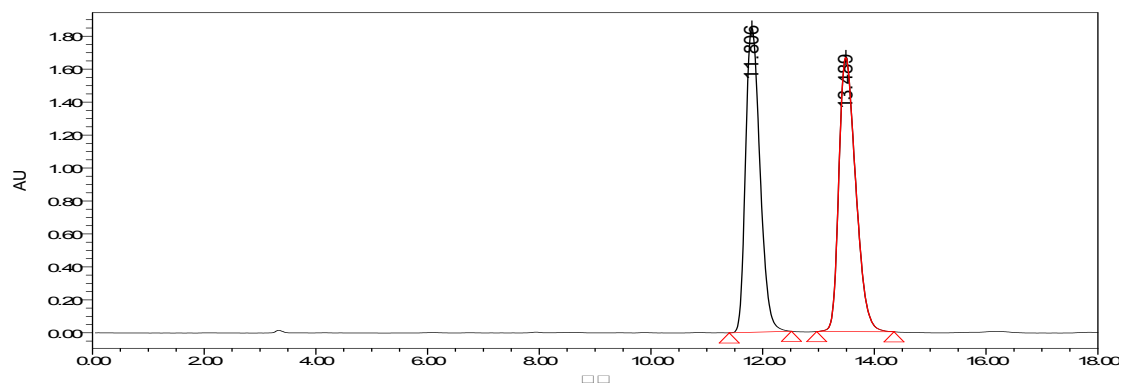

| Peak | Ret Time [min] | Area     | % Area | Height  | Type |
|------|----------------|----------|--------|---------|------|
| 1    | 11.806         | 33244408 | 48.80  | 1848723 | bb   |
| 2    | 13.489         | 34877277 | 51.20  | 1664852 | bb   |

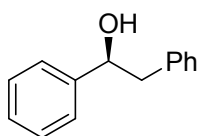

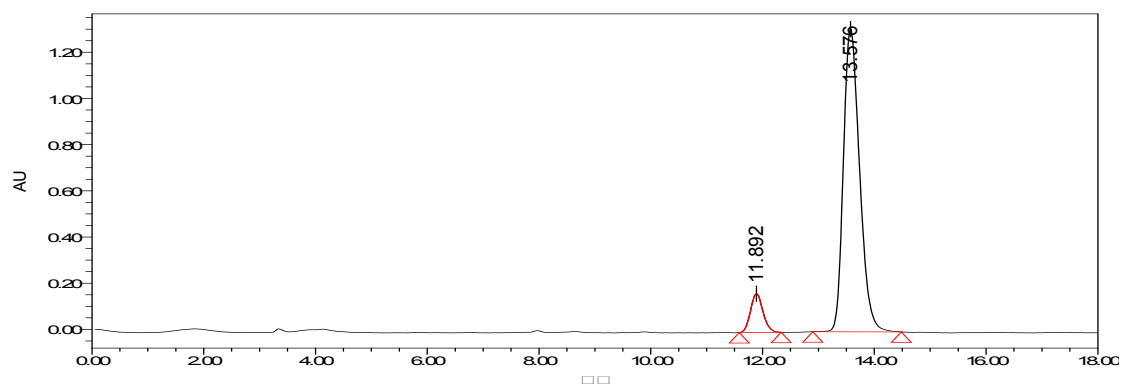

| Peak | Ret Time [min] | Area     | % Area | Height  | Type |
|------|----------------|----------|--------|---------|------|
| 1    | 11.892         | 2609658  | 8.99   | 168012  | bb   |
| 2    | 13.576         | 26418066 | 91.01  | 1312893 | bb   |

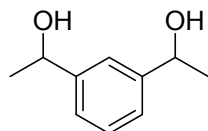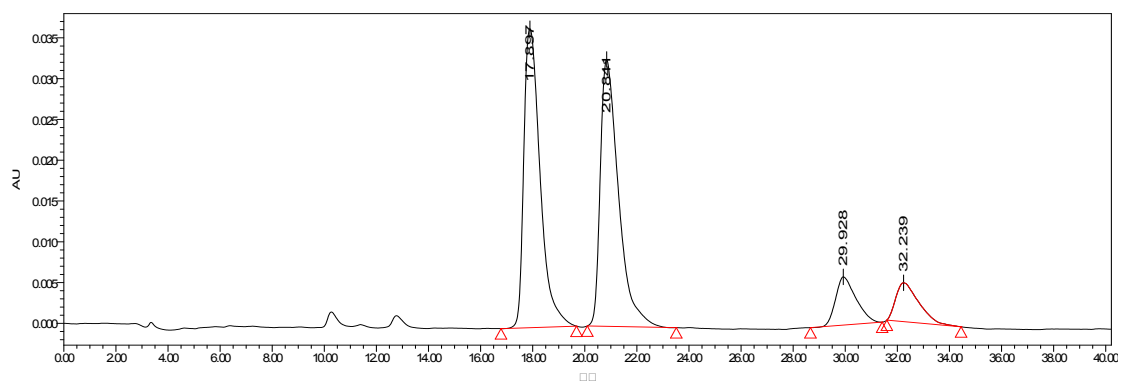

| Peak | Ret Time [min] | Area    | % Area | Height | Type |
|------|----------------|---------|--------|--------|------|
| 1    | 17.897         | 1598497 | 42.08  | 36650  | bb   |
| 2    | 20.841         | 1586914 | 41.77  | 32729  | bb   |
| 3    | 29.928         | 321781  | 8.47   | 5918   | bb   |
| 4    | 32.239         | 291888  | 7.68   | 4754   | bb   |

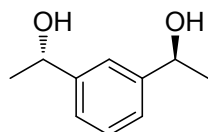

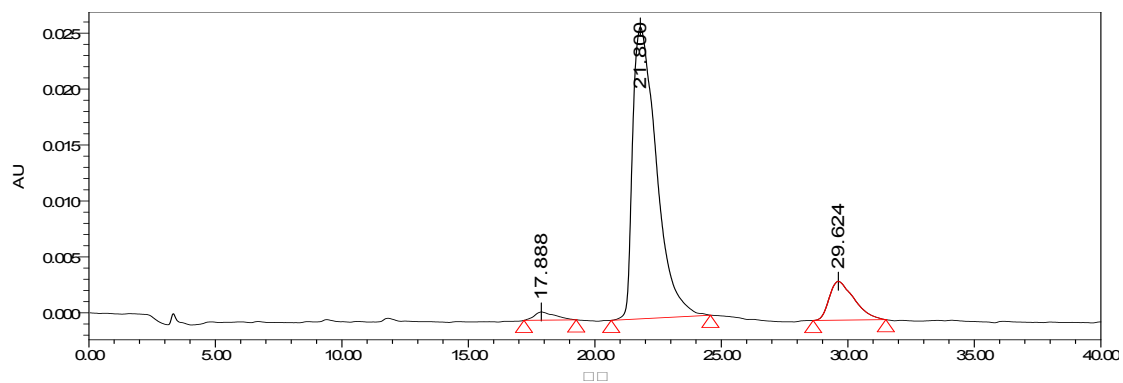

| Peak | Ret Time [min] | Area    | % Area | Height | Type |
|------|----------------|---------|--------|--------|------|
| 1    | 17.888         | 48219   | 2.41   | 787    | bb   |
| 2    | 21.800         | 1711728 | 85.46  | 26113  | bb   |
| 3    | 29.624         | 243103  | 12.14  | 3509   | bb   |

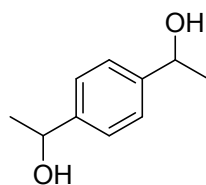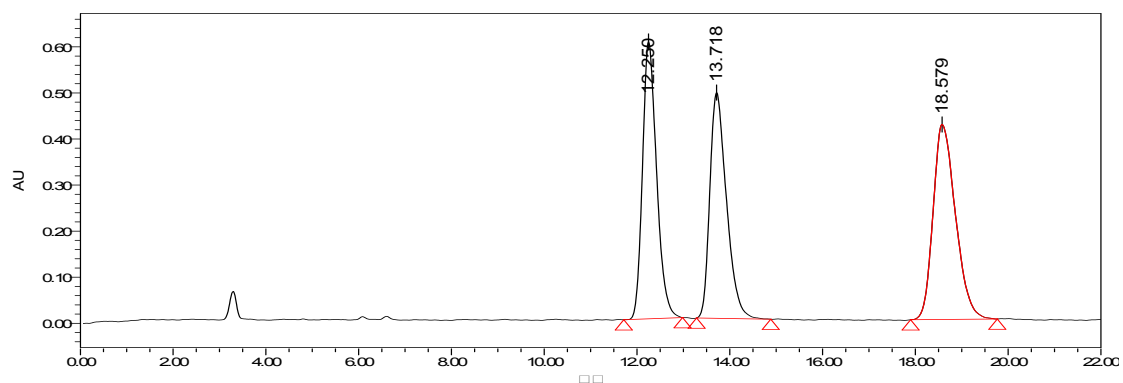

| Peak | Ret Time [min] | Area     | % Area | Height | Type |
|------|----------------|----------|--------|--------|------|
| 1    | 12.250         | 12705689 | 32.49  | 601947 | BV   |
| 2    | 13.718         | 12210893 | 31.22  | 490167 | VB   |
| 3    | 18.579         | 14193679 | 36.29  | 423458 | BB   |

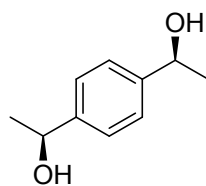

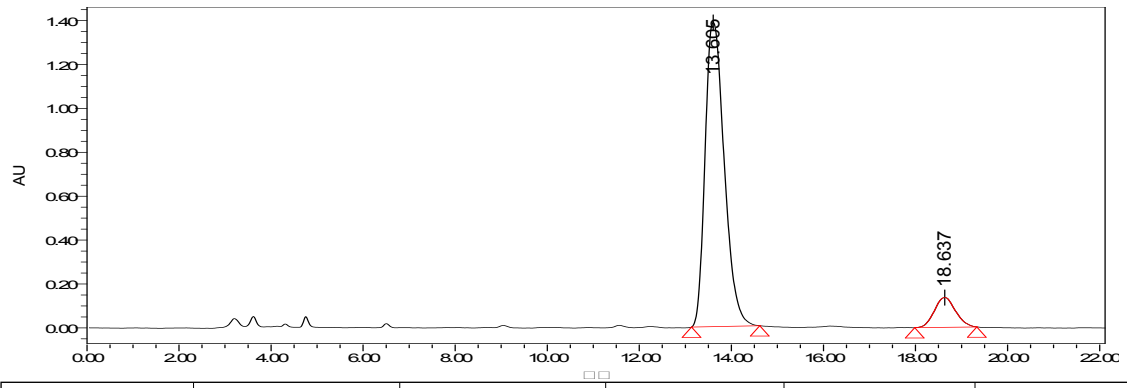

| Peak | Ret Time [min] | Area     | % Area | Height  | Type |
|------|----------------|----------|--------|---------|------|
| 1    | 13.605         | 40100638 | 90.22  | 1386482 | bb   |
| 2    | 18.637         | 4348180  | 9.78   | 135834  | bb   |
